# Supplementary material for: Alginate oligosaccharide (AOS) improves immuno-metabolic systems by inhibiting STOML2 overexpression in high-fat-diet-induced obese zebrafish
Source: Royal Society of Chemistry journal article supplement (doi:10.1039/c9fo00982e), 2019-01-01
Supplement: c9fo00982e1.pdf [file c9fo00982e1.pdf]

## Supplementary

**Table S1.** Summary of chemicals used

| CHEMICALS | FULL NAME                                                                                                                             | IDENTIFIER SOURCE                                                                           | FUNCTION TARGETED                                       |
|-----------|---------------------------------------------------------------------------------------------------------------------------------------|---------------------------------------------------------------------------------------------|---------------------------------------------------------|
| AICAR     | 5-Aminoimidazole-4-carboxamide 1- $\beta$ -D-ribofuranoside, Acadesine, N1-( $\beta$ -D-Ribofuranosyl)-5-aminoimidazole-4-carboxamide | AICAR, A9978 $\geq$ 98% (HPLC), Sigma, Product of Canada; Lot # 033M4706V                   | AMP-activated protein kinase (AMPK) activator (inducer) |
| KNK437    | 3-(1,3-Benzodioxol-5-ylmethylene)-2-oxo-1-pyrrolidinecarboxaldehyde                                                                   | KNK437, SML0964 $\geq$ 98% (HPLC), Sigma, Product of USA; Lot # 024M4622V                   | Heat shock proteins inhibitor                           |
| U0126     | 1,4-Diamino-2,3-dicyano-1,4-bis(o-aminophenylmercapto)butadiene monoethanolate                                                        | U0126 monoethanolate, U120 $\geq$ 98% (HPLC), Sigma, Product of USA; Lot # 032M4603V        | Mitogen-activated protein kinase (MAPK)/ERK inhibitor   |
| LPS       | Lipopolysaccharides                                                                                                                   | LPS, L6529 (from <i>Escherichia coli</i> 055:B5), Sigma, Product of Israel; Lot # 121M4024V | Pro-inflammatory cytokines inducer                      |

**Table S2.** Details of the primer sequence used for qRT-PCR

| <b>PRIMER</b>                   | <b>SEQUENCE (5' – 3')</b>                                              |
|---------------------------------|------------------------------------------------------------------------|
| <i>ACCA</i>                     | Forward: CACGATGCTCAGTTGTGTCC<br>Reverse: CCATGACAGTGGACTTGACG         |
| <i>FAS</i>                      | Forward: GAGAAAGCTTGCCAAACAGG<br>Reverse: GAGGGTCTTGCAGGAGACAG         |
| <i>LEPTIN</i>                   | Forward: AGCTCTCCGCTCAACCTGTA<br>Reverse: CAGCGGGAATCTCTGGATAA         |
| <i>SREBF1</i>                   | Forward: CATCCACATGGCTCTGAGTG<br>Reverse: CTCATCCACAAAGAAGCGGT         |
| <i>AMPK<math>\alpha</math></i>  | Forward: AGTTATCAGCACACCGACAG<br>Reverse: AGTAATCCACCCCTGAGATG         |
| <i>ERK1</i>                     | Forward: GCCCTACGTCCAGGAGTACA<br>Reverse: TTA CTCTTGCTGGCGAAC          |
| <i>ATP2A1</i>                   | Forward: AAGTTGGCGAGGCTACAGAG<br>Reverse: CCTTGGACAGACCACGAACA         |
| <i>SIRT1</i>                    | Forward: ACAGTTCCAGCCATCTCCATGTCA<br>Reverse: AAGACCCGTGGCACTGAATGATCT |
| <i>IFN-<math>\gamma</math></i>  | Forward: GAGAGGCTGGCACATGTTCAA<br>Reverse: CTCTGCACTCTTGCCTGGAAA       |
| <i>IL-1<math>\beta</math></i>   | Forward: ATCCAAACGGATACGACCAG<br>Reverse: TCGGTGTCTTTCCCTGTCCAT        |
| <i>IL-6</i>                     | Forward: TCAACTTCTCCAGCGTGATG<br>Reverse: TCTTCCCTCTTTCCCTCTG          |
| <i>TNF-<math>\alpha</math></i>  | Forward: AGGCAATTTCACTTCCAAGG<br>Reverse: AGGTCTTTGATTCAGAGTTGTATCC    |
| <i>HSPA5</i>                    | Forward: AAGAGGCCGAAGAGAAGGAC<br>Reverse: AGCAGCAGAGCCTCGAAATA         |
| <i>HSP90b1</i>                  | Forward: ATGGCACCAAGAAGAATGACTT<br>Reverse: GCACCAGCTTTTTACGGATAAC     |
| <i>AKT1</i>                     | Forward: ACAATGATTACGGTCGTGCG<br>Reverse: TTCTTGAGAAGGCCGAGAG          |
| <i>PGC-1<math>\alpha</math></i> | Forward: GGCCAGCGAGCCAAACCAA<br>Reverse: TGGCTTTGTGAGGAGCGTGG          |
| <i>BAX</i>                      | Forward: GATACGGGCAGTGGCAATGA<br>Reverse: ACTCCGGGTCACTTCAGCAT         |
| <i>BCL-2</i>                    | Forward: CGAGTGTGTGGAGAAGGAGATG<br>Reverse: TGGTTGTCTAGGTAGACGGTCAT    |
| <i>NR3C1</i>                    | Forward: TCTCCTCCCAACAGCAGGAC<br>Reverse: GTTGCATACAGTCGCAGCC          |
| <i>TP53</i>                     | Forward: AGTTAAGTGATGTGGTGCCTGCCT<br>Reverse: ATCAGCTTCTTTCCCTGTTTGGGC |
| <i>VDAC1</i>                    | Forward: GGAGGIACCAGCTGACCAAAG<br>Reverse: ACAGCCCAGGTAAATGTGCT        |
| <i>UCP1</i>                     | Forward: AGCCACAGACGTGGTAAAG<br>Reverse: CGGCAGAGTTCCTTTCCAGA          |
| <i>STOML2</i><br>(NM 201031.1)  | Forward: GATGGGCTTCCAGTCTTCCC<br>Reverse: ATTCGGTGAAAGCGTCCCAT         |
| <i><math>\beta</math>-ACTIN</i> | Forward: ATGAAGATCCTGACCGAG<br>Reverse: TAGCTCTTCTCCAGGGAG             |

**Table S3-1.** Summary of a total of 519 proteins identified by Progenesis QIP and their relative expression ratios.

| Accession  | Description                                                                                | Peptide count | Unique peptides | HFD vs. NFD |             | HAOS vs. HFD |             |
|------------|--------------------------------------------------------------------------------------------|---------------|-----------------|-------------|-------------|--------------|-------------|
|            |                                                                                            |               |                 | p-value     | Fold change | p-value      | Fold change |
| A0A0A0MPS0 | Si:dkey-222h21.2 OS=Danio rerio<br>GN=si:dkey-222h21.2 PE=4 SV=1                           | 8             | 1               | 0.000573804 | 1.50609578  | 0.012676344  | 0.786519766 |
| A0A0B5GNT7 | Bone morphogenetic protein 16 OS=Danio rerio<br>GN=bmp16 PE=2 SV=1                         | 3             | 3               | 0.949143472 | 0.961292974 | 0.177590678  | 1.138279807 |
| A0A0G2KGN7 | Uncharacterized protein OS=Danio rerio<br>PE=4 SV=1                                        | 6             | 1               | 0.57635515  | 1.035846533 | 0.07205454   | 0.901445177 |
| A0A0G2KGY3 | Uncharacterized protein OS=Danio rerio<br>PE=4 SV=1                                        | 2             | 1               | 0.000951693 | 0.358426449 | 0.175675079  | 1.187607958 |
| A0A0G2KL83 | Uncharacterized protein OS=Danio rerio<br>PE=4 SV=1                                        | 4             | 1               | 0.00024477  | 3.75694322  | 0.000993273  | 0.598377703 |
| A0A0G2KN74 | Uncharacterized protein OS=Danio rerio<br>PE=4 SV=1                                        | 5             | 3               | 0.051160265 | 1.224985714 | 0.070461923  | 0.869709204 |
| A0A0G2KR36 | Uncharacterized protein (Fragment)<br>OS=Danio rerio PE=4 SV=1                             | 6             | 1               | 0.009928234 | 2.539025871 | 0.073515115  | 0.884535078 |
| A0A0G2KUN8 | Uncharacterized protein OS=Danio rerio<br>PE=1 SV=1                                        | 5             | 5               | 0.078717719 | 0.036342676 | 0.084326671  | 1.459707768 |
| A0A0G2L2K5 | Uncharacterized protein OS=Danio rerio<br>GN=LOC564077 PE=1 SV=1                           | 2             | 2               | 0.033676479 | 0.032459075 | 0.22747149   | 2.816851436 |
| A0A0G2L6I6 | Isocitrate dehydrogenase [NADP]<br>OS=Danio rerio PE=1 SV=1                                | 23            | 15              | 3.19E-05    | 3.135716213 | 0.000568442  | 0.662521705 |
| A0A0G2L848 | Uncharacterized protein OS=Danio rerio<br>PE=4 SV=1                                        | 2             | 2               | 0.008647371 | 11.37864282 | 0.299260936  | 1.362313143 |
| A0A0H2UKK8 | Pseudouridylyl synthase 7 (putative)<br>OS=Danio rerio GN=pus7 PE=1 SV=1                   | 3             | 1               | 0.000110696 | 2.33956922  | 0.002659846  | 0.736527276 |
| A0A0H2UKT2 | Utrophin (Fragment) OS=Danio rerio<br>GN=utrn PE=1 SV=1                                    | 8             | 3               | 0.001040567 | 0.31106145  | 0.934495212  | 0.994075724 |
| A0A0N4STW3 | Complement component c3b, tandem<br>duplicate 1 OS=Danio rerio GN=c3b.1<br>PE=4 SV=1       | 11            | 1               | 0.000638454 | 2.012500309 | 0.025260076  | 0.767601352 |
| A0A0N4SU68 | Uncharacterized protein OS=Danio rerio<br>GN=smyhc3 PE=3 SV=1                              | 4             | 1               | 0.434974445 | 1.208796045 | 0.000232331  | 0.806417323 |
| A0A0N4SU72 | Si:ch73-236c18.6 OS=Danio rerio<br>GN=si:ch73-236c18.6 PE=4 SV=1                           | 6             | 2               | 0.037748978 | 1.200207068 | 0.09079342   | 0.863220529 |
| A0A0N4SUF4 | Uncharacterized protein OS=Danio rerio<br>GN=smyhc3 PE=3 SV=1                              | 4             | 1               | 0.849117642 | 0.953528753 | 0.009635236  | 0.910385255 |
| A0A0R4I9C4 | Triosephosphate isomerase OS=Danio rerio<br>GN=tpi1b PE=1 SV=1                             | 16            | 7               | 0.191364091 | 1.090355814 | 0.565011968  | 1.028032517 |
| A0A0R4I9I7 | Genetic suppressor element 1 OS=Danio rerio<br>GN=gse1 PE=1 SV=1                           | 7             | 5               | 0.802543004 | 0.743690238 | 0.009495412  | 0.822810518 |
| A0A0R4IA56 | Creatine kinase, muscle b OS=Danio rerio<br>GN=ckmb PE=1 SV=1                              | 68            | 30              | 0.131574001 | 0.870030321 | 0.232619417  | 0.950260762 |
| A0A0R4IA89 | Si:ch211-203c5.3 OS=Danio rerio<br>GN=si:ch211-203c5.3 PE=4 SV=1                           | 2             | 1               | 0.012296732 | 0.227261713 | 0.000127025  | 4.449589252 |
| A0A0R4IAK4 | Si:dkey-190j3.4 OS=Danio rerio<br>GN=si:dkey-190j3.4 PE=4 SV=1                             | 7             | 1               | 0.010466339 | 1.229198438 | 0.062467556  | 0.881853202 |
| A0A0R4IAK9 | Ubiquinol-cytochrome c reductase core<br>protein Ila OS=Danio rerio GN=uqrc2a<br>PE=1 SV=1 | 3             | 3               | 0.001599243 | 3.331054908 | 0.49600755   | 0.935693448 |
| A0A0R4IB01 | Si:dkey-165e24.1 OS=Danio rerio<br>GN=si:dkey-165e24.1 PE=4 SV=1                           | 6             | 1               | 0.000546698 | 2.951958048 | 0.001472405  | 0.667791213 |
| A0A0R4IBI0 | DENN/MADD domain-containing 4B<br>OS=Danio rerio GN=dennd4b PE=1 SV=1                      | 2             | 1               | 0.034841313 | 1.219350649 | 0.061077566  | 0.905121938 |
| A0A0R4ICC8 | Stomatin (EPB72)-like 2 OS=Danio rerio<br>GN=stoml2 PE=1 SV=1                              | 2             | 2               | 0.006202809 | 16.53599455 | 0.000557046  | 0.524276562 |
| A0A0R4ICW1 | Si:dkeyp-94b4.1 OS=Danio rerio<br>GN=si:dkeyp-94b4.1 PE=1 SV=1                             | 5             | 2               | 0.011425597 | 1.345551299 | 0.1069289    | 0.932738702 |
| A0A0R4IDL5 | Si:ch211-232d10.1 OS=Danio rerio<br>GN=si:ch211-232d10.1 PE=4 SV=1                         | 8             | 1               | 4.97E-05    | 2.202386079 | 0.00053849   | 0.697950336 |
| A0A0R4IDU6 | T-cell lymphoma invasion and metastasis<br>1b OS=Danio rerio GN=tiam1b PE=4<br>SV=1        | 2             | 1               | 0.001408037 | 2.729876609 | 0.004982947  | 0.699256879 |
| A0A0R4IDW8 | Si:dkey-193i10.4 OS=Danio rerio<br>GN=si:dkey-193i10.4 PE=4 SV=1                           | 3             | 1               | 0.029389694 | 1.301112546 | 0.011046141  | 0.798322844 |
| A0A0R4IE10 | Elongation factor 1-alpha OS=Danio rerio<br>GN=eef1a111 PE=1 SV=1                          | 28            | 1               | 0.0006904   | 1.469824612 | 0.005211397  | 0.867857978 |
| A0A0R4IEU6 | Si:ch211-223g7.2 OS=Danio rerio<br>GN=si:ch211-223g7.2 PE=4 SV=1                           | 7             | 2               | 0.002321634 | 1.659133082 | 0.054603164  | 0.854804409 |
| A0A0R4IEY9 | Si:dkey-16p6.1 OS=Danio rerio<br>GN=si:dkey-16p6.1 PE=4 SV=1                               | 4             | 2               | 0.033854539 | 1.320118454 | 0.038242921  | 0.882226864 |
| A0A0R4IFA7 | Si:dkey-250k10.4 (Fragment) OS=Danio rerio<br>GN=si:dkey-250k10.4 PE=4 SV=1                | 6             | 2               | 0.141437374 | 1.298189161 | 0.637379478  | 0.975311528 |
| A0A0R4IFD1 | Reticulon-4-interacting protein 1 homolog,<br>mitochondrial OS=Danio rerio GN=rtn4ip1      | 3             | 1               | 0.008464273 | 1.130187317 | 0.613641035  | 0.974361893 |

|            |                                                                                                                   |    |    |             |             |             |             |
|------------|-------------------------------------------------------------------------------------------------------------------|----|----|-------------|-------------|-------------|-------------|
| A0A0R4IFF1 | Cytochrome P450, family 2, subfamily AA, polypeptide 7 OS=Danio rerio GN=cyp2aa7 PE=1 SV=1                        | 2  | 1  | 0.033087547 | 0.255297448 | 0.000999068 | 1.827403389 |
| A0A0R4IFJ4 | Pyruvate carboxylase OS=Danio rerio GN=pcxa PE=1 SV=1                                                             | 20 | 8  | 0.006099167 | 0.55348172  | 0.136205049 | 0.9313224   |
| A0A0R4IFT7 | Si:ch211-271g18.1 OS=Danio rerio GN=si:ch211-271g18.1 PE=4 SV=1                                                   | 4  | 1  | 0.225451882 | 1.12022341  | 0.067175612 | 0.868733073 |
| A0A0R4IFW1 | Zgc:171445 OS=Danio rerio GN=zgc:171445 PE=1 SV=1                                                                 | 27 | 6  | 0.405228133 | 1.111548162 | 0.005925258 | 0.801412568 |
| A0A0R4IGN3 | Protein disulfide-isomerase (Fragment) OS=Danio rerio GN=pdia3 PE=1 SV=1                                          | 15 | 9  | 0.000667044 | 3.30510559  | 0.003433813 | 0.73201314  |
| A0A0R4IGP6 | Pyruvate kinase OS=Danio rerio GN=pkma PE=1 SV=1                                                                  | 21 | 1  | 0.000480514 | 1.655927149 | 0.003110248 | 0.800841846 |
| A0A0R4IGQ8 | Myomesin 1b OS=Danio rerio GN=myom1b PE=1 SV=1                                                                    | 24 | 16 | 0.076856744 | 0.866009184 | 0.395301645 | 0.961840661 |
| A0A0R4IHC4 | Si:ch211-76m11.3 (Fragment) OS=Danio rerio GN=si:ch211-76m11.3 PE=4 SV=1                                          | 4  | 1  | 0.000649233 | 2.976059905 | 0.001414465 | 0.661671786 |
| A0A0R4IHH2 | Si:ch211-246b8.1 OS=Danio rerio GN=si:ch211-246b8.1 PE=4 SV=1                                                     | 6  | 1  | 0.000677778 | 2.959686503 | 0.001362097 | 0.661866285 |
| A0A0R4IHV1 | Pyruvate kinase OS=Danio rerio GN=pkmb PE=1 SV=1                                                                  | 23 | 16 | 0.009979593 | 2.281385885 | 0.474093043 | 0.914763094 |
| A0A0R4IHY6 | Si:ch211-272n13.3 (Fragment) OS=Danio rerio GN=si:ch211-272n13.3 PE=4 SV=1                                        | 3  | 2  | 0.881101476 | 1.037059773 | 0.856305361 | 0.996658467 |
| A0A0R4II04 | Si:dkey-29j8.1 OS=Danio rerio GN=si:dkey-29j8.1 PE=4 SV=1                                                         | 10 | 2  | 3.22E-05    | 2.802234343 | 0.000207298 | 0.698606849 |
| A0A0R4II73 | Solute carrier family 25 (aspartate/glutamate carrier), member 12 (Fragment) OS=Danio rerio GN=slc25a12 PE=1 SV=1 | 25 | 19 | 0.002924111 | 0.532752194 | 0.412565942 | 1.031187714 |
| A0A0R4II89 | Catalase OS=Danio rerio GN=cat PE=1 SV=1                                                                          | 12 | 10 | 0.002195873 | 1.286679165 | 0.748901859 | 0.982594466 |
| A0A0R4IIH4 | FYVE and coiled-coil domain-containing 1a OS=Danio rerio GN=fyco1a PE=1 SV=1                                      | 22 | 13 | 0.000646066 | 2.097967893 | 0.019915594 | 0.845803384 |
| A0A0R4IHW8 | Si:dkey-7114.4 OS=Danio rerio GN=si:dkey-7114.4 PE=4 SV=1                                                         | 5  | 1  | 0.000307368 | 3.119746855 | 0.000720046 | 0.664381746 |
| A0A0R4IU29 | Si:dkey-14o6.2 OS=Danio rerio GN=si:dkey-14o6.2 PE=4 SV=1                                                         | 6  | 1  | 0.000444254 | 2.977983707 | 0.000921605 | 0.667119845 |
| A0A0R4IU35 | Si:ch211-156l18.7 OS=Danio rerio GN=si:ch211-156l18.7 PE=3 SV=1                                                   | 9  | 1  | 0.008019281 | 1.748017695 | 0.42633469  | 0.963842511 |
| A0A0R4IJS2 | Si:ch211-59d8.2 (Fragment) OS=Danio rerio GN=si:ch211-59d8.2 PE=4 SV=1                                            | 7  | 1  | 0.000156649 | 2.547390691 | 0.00123856  | 0.686383034 |
| A0A0R4IKF0 | Apolipoprotein A-Ib OS=Danio rerio GN=apoa1b PE=1 SV=1                                                            | 25 | 19 | 0.087717597 | 1.156860975 | 0.714085139 | 1.017722888 |
| A0A0R4IKI3 | Tripartite motif-containing 25 OS=Danio rerio GN=trim25 PE=1 SV=1                                                 | 3  | 1  | 0.517401484 | 1.041880906 | 0.154423956 | 0.911682006 |
| A0A0R4IL11 | Leucine-rich repeat (in FLII)-interacting protein 1a OS=Danio rerio GN=lrrfip1a PE=4 SV=1                         | 2  | 2  | 0.292804044 | 0.860574999 | 0.203062534 | 1.100195352 |
| A0A0R4IL59 | Si:ch211-229110.4 OS=Danio rerio GN=si:ch211-229110.4 PE=4 SV=1                                                   | 12 | 3  | 0.049213538 | 1.257572789 | 0.046294574 | 0.871835039 |
| A0A0R4IL12 | Si:dkey-92c21.1 (Fragment) OS=Danio rerio GN=si:dkey-92c21.1 PE=4 SV=1                                            | 8  | 2  | 0.002077118 | 1.70014871  | 0.001861456 | 0.740799342 |
| A0A0R4ILP1 | Calreticulin 3a OS=Danio rerio GN=calr3a PE=1 SV=1                                                                | 4  | 3  | 0.189580456 | 1.723914122 | 0.091517218 | 1.461959472 |
| A0A0R4IMW8 | Si:zfos-2131b9.2 (Fragment) OS=Danio rerio GN=si:zfos-2131b9.2 PE=4 SV=1                                          | 9  | 1  | 0.031911517 | 0.76216178  | 0.064518679 | 1.251256177 |
| A0A0R4IN16 | Si:dkey-264f17.2 OS=Danio rerio GN=si:dkey-264f17.2 PE=4 SV=1                                                     | 4  | 1  | 0.000571602 | 2.941107745 | 0.001204328 | 0.654420044 |
| A0A0R4IP07 | Elongation factor 1-gamma OS=Danio rerio GN=eef1g PE=1 SV=1                                                       | 9  | 4  | 0.28089306  | 1.147635557 | 0.099949582 | 0.915233801 |
| A0A0R4IP08 | Si:dkey-211i20.2 OS=Danio rerio GN=si:dkey-211i20.2 PE=4 SV=1                                                     | 5  | 2  | 0.00026146  | 2.257682583 | 0.002443347 | 0.686619207 |
| A0A0R4IP15 | Neogenin 1a OS=Danio rerio GN=neo1a PE=4 SV=1                                                                     | 2  | 2  | 0.435245803 | 1.231107591 | 0.008623645 | 1.525629377 |
| A0A0R4IP16 | Si:ch211-39d8.1 OS=Danio rerio GN=si:ch211-39d8.1 PE=4 SV=1                                                       | 5  | 1  | 0.00067265  | 2.967684702 | 0.001341863 | 0.65936457  |
| A0A0R4IP53 | TAO kinase 1b OS=Danio rerio GN=taok1b PE=4 SV=1                                                                  | 5  | 2  | 0.013555091 | 1.931971083 | 0.001671098 | 0.733515064 |
| A0A0R4IPE2 | Si:dkey-46g23.5 OS=Danio rerio GN=si:dkey-46g23.5 PE=1 SV=1                                                       | 28 | 9  | 0.004933824 | 1.243931521 | 0.0122054   | 0.849621366 |
| A0A0R4IPH2 | Tubulin beta chain OS=Danio rerio GN=tubb4b PE=1 SV=1                                                             | 33 | 1  | 0.149889587 | 1.039079494 | 0.208826136 | 1.047579104 |
| A0A0R4IPK3 | Myomesin 2a (Fragment) OS=Danio rerio GN=myom2a PE=1 SV=1                                                         | 7  | 1  | 0.003943091 | 3.242013334 | 0.679548058 | 1.019863249 |
| A0A0R4IQ11 | Scinderin-like a OS=Danio rerio GN=scinla PE=1 SV=1                                                               | 2  | 1  | 0.172401143 | 1.24100496  | 0.372609387 | 0.924739212 |
| A0A0R4IQC8 | Si:dkeyp-35e5.5 OS=Danio rerio GN=si:dkeyp-35e5.5 PE=4 SV=1                                                       | 14 | 2  | 0.396860241 | 0.935522208 | 0.881712265 | 0.993460878 |
| A0A0R4IQE4 | Si:ch211-196f19.1 OS=Danio rerio GN=si:ch211-196f19.1 PE=4 SV=1                                                   | 6  | 1  | 0.005759478 | 3.209239806 | 0.006763221 | 0.752118486 |
| A0A0R4IQI9 | Cytoskeleton-associated protein                                                                                   | 5  | 12 | 0.00023124  | 3.474135523 | 0.000589932 | 0.674213706 |

|            |                                                                                                                                 |     |    |             |             |             |             |  |  |
|------------|---------------------------------------------------------------------------------------------------------------------------------|-----|----|-------------|-------------|-------------|-------------|--|--|
|            | OS=Danio rerio GN=ckap5 PE=1 SV=1                                                                                               |     |    |             |             |             |             |  |  |
| A0A0R4IQN7 | Si:ch211-209j12.6 OS=Danio rerio GN=si:ch211-209j12.6 PE=4 SV=1                                                                 | 2   | 1  | 0.283600435 | 1.10826108  | 0.083425249 | 0.88056636  |  |  |
| A0A0R4IR90 | Myosin IB OS=Danio rerio GN=myo1b PE=1 SV=1                                                                                     | 6   | 4  | 0.000478736 | 5.561367396 | 0.020287273 | 1.156373496 |  |  |
| A0A0R4IRB5 | General transcription factor IIB OS=Danio rerio GN=gtf2b PE=1 SV=1                                                              | 3   | 3  | 0.009052174 | 3.67435287  | 0.298313067 | 0.772474216 |  |  |
| A0A0R4IRS6 | Sideroflexin (Fragment) OS=Danio rerio GN=sfxn5a PE=3 SV=1                                                                      | 2   | 1  | 0.002907717 | 5.000975669 | 0.861169841 | 0.958962535 |  |  |
| A0A0R4IRT1 | Sodium/potassium-transporting ATPase subunit alpha OS=Danio rerio GN=atp1a1a.1 PE=1 SV=1                                        | 29  | 2  | 0.001777154 | 1.23022117  | 0.076623197 | 0.915632864 |  |  |
| A0A0R4ISX6 | Protein disulfide-isomerase OS=Danio rerio GN=p4hb PE=1 SV=1                                                                    | 18  | 11 | 0.000103435 | 2.384613978 | 0.002040387 | 0.745032223 |  |  |
| A0A0R4ITY7 | Si:ch211-76m11.8 OS=Danio rerio GN=si:ch211-76m11.8 PE=4 SV=1                                                                   | 6   | 1  | 0.000502833 | 2.335832912 | 0.002227229 | 0.691278013 |  |  |
| A0A0R4IU19 | Si:ch211-93f2.1 (Fragment) OS=Danio rerio GN=si:ch211-93f2.1 PE=1 SV=1                                                          | 4   | 2  | 0.170218368 | 0.279393608 | 0.52265894  | 1.132953619 |  |  |
| A0A0R4IU65 | Creatine kinase, brain a OS=Danio rerio GN=ckba PE=1 SV=1                                                                       | 26  | 1  | 0.002042677 | 1.227689603 | 0.125405292 | 0.921351585 |  |  |
| A0A0R4IUB8 | Si:dkeyp-5g9.1 OS=Danio rerio GN=si:dkeyp-5g9.1 PE=4 SV=1                                                                       | 4   | 1  | 0.013257627 | 1.336384852 | 0.069272577 | 0.877063536 |  |  |
| A0A0R4IUG7 | Glutamate dehydrogenase Ia OS=Danio rerio GN=glud1a PE=1 SV=1                                                                   | 14  | 5  | 0.476844172 | 1.026268866 | 0.235811446 | 0.942436435 |  |  |
| A0A0R4IUS1 | Si:ch211-223g7.6 OS=Danio rerio GN=si:ch211-223g7.6 PE=4 SV=1                                                                   | 9   | 2  | 4.48E-05    | 2.404089047 | 0.00192935  | 0.757058554 |  |  |
| A0A0R4IUS8 | Si:dkey-29m1.2 OS=Danio rerio GN=si:dkey-29m1.2 PE=4 SV=1                                                                       | 4   | 1  | 0.000472949 | 2.987076736 | 0.000605749 | 0.648797149 |  |  |
| A0A0R4IVB0 | Heat shock cognate 71 kDa protein OS=Danio rerio GN=hspa8 PE=1 SV=1                                                             | 33  | 2  | 0.000529251 | 3.621026149 | 0.017190517 | 0.63830842  |  |  |
| A0A0R4IVJ6 | Si:dkey-121j17.5 OS=Danio rerio GN=si:dkey-121j17.5 PE=4 SV=1                                                                   | 3   | 1  | 0.714121815 | 0.979757271 | 0.208103537 | 0.811261768 |  |  |
| A0A0R4IWC6 | Annexin OS=Danio rerio GN=anxa1a PE=1 SV=1                                                                                      | 6   | 3  | 0.018391498 | 0.57913314  | 0.971357813 | 0.996147153 |  |  |
| A0A0R4IWE9 | Crystallin, beta A1a OS=Danio rerio GN=eryba1a PE=1 SV=1                                                                        | 2   | 2  | 0.912812414 | 0.925714509 | 0.000481893 | 2.030093765 |  |  |
| A0A0R4IX62 | Si:dkey-16p6.1 OS=Danio rerio GN=si:dkey-16p6.1 PE=4 SV=1                                                                       | 3   | 1  | 0.029288418 | 1.348250177 | 0.039841256 | 0.844955397 |  |  |
| A0A0R4IXC8 | Tubulin beta chain OS=Danio rerio GN=tubb6 PE=1 SV=1                                                                            | 12  | 4  | 0.174150362 | 1.053774305 | 0.481810384 | 1.033430904 |  |  |
| A0A0R4IXD7 | Endothelin-converting enzyme 1 OS=Danio rerio GN=ece1 PE=4 SV=1                                                                 | 3   | 2  | 0.180516616 | 1.599851254 | 0.428722248 | 0.810745167 |  |  |
| A0A0R4IY80 | Si:dkey-264f17.1 OS=Danio rerio GN=si:dkey-264f17.1 PE=4 SV=1                                                                   | 4   | 1  | 0.000529998 | 2.931677331 | 0.001608875 | 0.678124155 |  |  |
| A0A0R4IYS5 | Si:ch211-171i17.4 (Fragment) OS=Danio rerio GN=si:ch211-171i17.4 PE=4 SV=1                                                      | 6   | 1  | 0.005026542 | 2.088669452 | 0.143548018 | 0.916257485 |  |  |
| A0A0R4IYW7 | Si:dkey-27n6.1 OS=Danio rerio GN=si:dkey-27n6.1 PE=4 SV=1                                                                       | 7   | 3  | 0.000449953 | 2.424390606 | 0.000402744 | 0.646618543 |  |  |
| A0A0R4IZD9 | Si:ch211-205a14.7 OS=Danio rerio GN=si:ch211-205a14.7 PE=4 SV=1                                                                 | 9   | 3  | 0.001624419 | 1.864324105 | 0.002292558 | 0.718291766 |  |  |
| A0A140LGS0 | Solute carrier family 7 (anionic amino acid transporter light chain, xc- system), member 11 OS=Danio rerio GN=slc7a11 PE=4 SV=1 | 2   | 1  | 0.015334591 | 0.567404071 | 0.291879208 | 1.152941414 |  |  |
| A0AUR2     | Sarcalumenin OS=Danio rerio GN=srl PE=1 SV=1                                                                                    | 9   | 6  | 0.048965533 | 0.664994631 | 0.043430075 | 1.129208125 |  |  |
| A0JMD0     | Clustered mitochondria protein homolog OS=Danio rerio GN=cluh PE=2 SV=1                                                         | 2   | 2  | 0.598117748 | 1.104360231 | 0.303514572 | 1.17699014  |  |  |
| A0JMP4     | Calcium-transporting ATPase OS=Danio rerio GN=atp2a11 PE=1 SV=1                                                                 | 103 | 37 | 0.000261172 | 1.806722341 | 0.001773418 | 0.7975854   |  |  |
| A1A600     | EF-hand calcium-binding domain-containing protein 4A OS=Danio rerio GN=cracr2b PE=2 SV=2                                        | 3   | 3  | 0.008567541 | 6.750042056 | 0.694275014 | 1.047446565 |  |  |
| A1A605     | Y box binding protein 1 OS=Danio rerio GN=ybx1 PE=1 SV=1                                                                        | 4   | 3  | 0.180943626 | 0.904817611 | 0.027443825 | 1.200406512 |  |  |
| A2AR68     | Rab GDP dissociation inhibitor OS=Danio rerio GN=gdi1 PE=1 SV=1                                                                 | 9   | 3  | 0.959900282 | 0.9589003   | 0.283960622 | 1.041054338 |  |  |
| A2BHA3     | Creatine kinase, muscle a OS=Danio rerio GN=ckma PE=1 SV=1                                                                      | 61  | 25 | 0.007899446 | 0.860351254 | 0.850145211 | 1.009654519 |  |  |
| A2BIP1     | ATPase, Ca <sup>++</sup> -transporting, ubiquitous (Fragment) OS=Danio rerio GN=atp2a3 PE=1 SV=1                                | 41  | 1  | 0.001621626 | 1.230373152 | 0.359660418 | 0.96887441  |  |  |
| A2CE51     | Eukaryotic translation elongation factor 2, -like 2 OS=Danio rerio GN=eef2l2 PE=1 SV=1                                          | 23  | 3  | 0.657720488 | 1.054855692 | 0.105919357 | 0.935135225 |  |  |
| A2CEI6     | Piwi-like protein 2 OS=Danio rerio GN=piwil2 PE=1 SV=2                                                                          | 5   | 2  | 0.000439415 | 3.546206245 | 0.000230866 | 0.586373849 |  |  |
| A2CEZ0     | Si:dkey-251i10.1 OS=Danio rerio GN=si:dkey-251i10.1 PE=3 SV=1                                                                   | 17  | 1  | 0.000782915 | 1.898164369 | 0.003858365 | 0.790045603 |  |  |
| A2CG95     | Acyl-CoA dehydrogenase, C-4 to C-12 straight chain OS=Danio rerio GN=acadm PE=1 SV=1                                            | 6   | 4  | 0.034005982 | 2.351459983 | 0.47613394  | 1.022940531 |  |  |

|        |                                                                                                                                |    |    |             |             |             |             |
|--------|--------------------------------------------------------------------------------------------------------------------------------|----|----|-------------|-------------|-------------|-------------|
| A3KPR4 | Histone H4 OS=Danio rerio GN=si:dkey-108k21.23 PE=1 SV=1                                                                       | 6  | 3  | 0.724320003 | 1.036447709 | 0.160529307 | 0.921989401 |
| A3KPT4 | CLIP-associating protein 2 OS=Danio rerio GN=clasp2 PE=1 SV=1                                                                  | 5  | 3  | 0.190526229 | 1.854107592 | 0.469265966 | 1.100020533 |
| A4QPA0 | Malic enzyme OS=Danio rerio GN=me3 PE=1 SV=1                                                                                   | 2  | 2  | 0.014824896 | 3.237519843 | 0.00152808  | 0.725823159 |
| A5PMP8 | Complement component c3b, tandem duplicate 2 OS=Danio rerio GN=c3b.2 PE=4 SV=1                                                 | 12 | 3  | 0.006965758 | 1.909691103 | 0.098437727 | 0.821529172 |
| A5WUN8 | Phospholipid phosphatase-related 5a OS=Danio rerio GN=plppr5a PE=4 SV=1                                                        | 2  | 1  | 0.000415187 | 2.939760686 | 0.011540034 | 0.709279438 |
| A5WUY5 | Novel keratin protein (Zgc:110712) OS=Danio rerio GN=DKEY-90G20.1 PE=1 SV=1                                                    | 9  | 5  | 0.648866147 | 0.93030719  | 0.0130473   | 0.859344736 |
| A5WVL5 | Fructose-1,6-bisphosphatase 2 OS=Danio rerio GN=fbp2 PE=1 SV=1                                                                 | 3  | 2  | 0.077677367 | 2.411339837 | 0.009552741 | 0.729434626 |
| A5WWJ0 | Uncharacterized protein OS=Danio rerio GN=cyp46a1.1 PE=1 SV=1                                                                  | 2  | 1  | 0.114755124 | 0.07166919  | 0.454348313 | 1.20016594  |
| A8DZ95 | Dihydropyrimidinase-like 2b OS=Danio rerio GN=dpysl2b PE=1 SV=1                                                                | 4  | 3  | 0.312336201 | 0.879986423 | 0.030298242 | 1.430093709 |
| A8DZD6 | GA-binding protein transcription factor, beta subunit 2b (Fragment) OS=Danio rerio GN=gabpb2b PE=1 SV=1                        | 2  | 2  | 0.009762362 | 4.428223354 | 0.959225325 | 0.969460921 |
| A8DZE4 | Glucose-6-phosphate isomerase OS=Danio rerio GN=gpib PE=1 SV=1                                                                 | 18 | 13 | 6.39E-05    | 2.032171624 | 0.013936006 | 0.834855456 |
| A8E5J9 | Ckmt2 protein OS=Danio rerio GN=ckmt2b PE=1 SV=1                                                                               | 21 | 6  | 0.000344951 | 2.295801315 | 0.091602882 | 0.916377588 |
| A8E7G6 | Peroxiredoxin 3 OS=Danio rerio GN=prdx3 PE=1 SV=1                                                                              | 4  | 2  | 0.015531291 | 2.662168754 | 0.03389662  | 0.731842504 |
| A8E7T3 | Si:dkey-51d8.2 OS=Danio rerio GN=si:dkey-51d8.2 PE=4 SV=2                                                                      | 3  | 1  | 0.000525866 | 3.14098314  | 0.001167522 | 0.65433891  |
| A8KBJ5 | Histone H3 OS=Danio rerio GN=zgc:173552 PE=1 SV=1                                                                              | 5  | 1  | 0.001181395 | 895.9162528 | 0.201017202 | 1.086954709 |
| A8KBU6 | Zgc:158846 OS=Danio rerio GN=zgc:158846 PE=2 SV=1                                                                              | 21 | 9  | 0.02200459  | 1.219548466 | 0.32929994  | 0.959520179 |
| A8KBV1 | Succinyl-CoA:3-ketoacid-coenzyme A transferase OS=Danio rerio GN=oxct1b PE=1 SV=1                                              | 6  | 3  | 0.593430737 | 1.067230288 | 0.091703155 | 0.904420687 |
| A8WGC6 | ATP synthase subunit beta OS=Danio rerio GN=atp5b PE=1 SV=1                                                                    | 46 | 38 | 0.000225829 | 1.475836163 | 0.003347051 | 0.828266287 |
| A9C3Q5 | Calcium-transporting ATPase OS=Danio rerio GN=atp2a2a PE=1 SV=1                                                                | 50 | 6  | 0.030906381 | 1.154867521 | 0.371092901 | 0.973965841 |
| B0R068 | Sodium/potassium-transporting ATPase subunit alpha OS=Danio rerio GN=atp1a1b PE=1 SV=1                                         | 22 | 4  | 5.43E-05    | 2.249021922 | 0.010596446 | 0.755836373 |
| B0R1D0 | Novel protein (Zgc:63709) OS=Danio rerio GN=psmc4 PE=1 SV=1                                                                    | 4  | 3  | 0.247932955 | 0.930130798 | 0.307090663 | 1.046944834 |
| B0S5A9 | Golgin A1 OS=Danio rerio GN=golga1 PE=1 SV=1                                                                                   | 5  | 4  | 0.361295723 | 0.689680341 | 0.903479051 | 1.008892597 |
| B0S5C5 | Acetyl-CoA acyltransferase 2 OS=Danio rerio GN=acaa2 PE=1 SV=1                                                                 | 3  | 1  | 0.364477936 | 1.23010375  | 0.342339701 | 1.198178336 |
| B0S5Q5 | Sodium/potassium-transporting ATPase subunit alpha OS=Danio rerio GN=atp1a2a PE=1 SV=1                                         | 19 | 2  | 0.000143475 | 1.948754522 | 0.075749773 | 0.883589487 |
| B0S610 | Heat shock cognate 70-kd protein,-like OS=Danio rerio GN=hsp70l PE=3 SV=1                                                      | 21 | 2  | 0.549377107 | 1.036400351 | 0.06816969  | 0.930176894 |
| B0S730 | Solute carrier family 25 (Mitochondrial carrier adenine nucleotide translocator), member 6 OS=Danio rerio GN=slc25a6 PE=1 SV=1 | 23 | 7  | 0.43118914  | 1.13493985  | 0.138683751 | 0.921673695 |
| B0UXL2 | Isocitrate dehydrogenase [NADP] OS=Danio rerio GN=idh1 PE=1 SV=1                                                               | 2  | 2  | 0.14564572  | 1.274411523 | 0.345846926 | 0.935269217 |
| B0UYA3 | Crystallin, lambda 1 OS=Danio rerio GN=cryl1 PE=1 SV=1                                                                         | 3  | 2  | 0.0659704   | 0.450439189 | 0.580482125 | 0.983315049 |
| B0UYE9 | GRIP1-associated protein 1 OS=Danio rerio GN=gripap1 PE=1 SV=1                                                                 | 5  | 2  | 0.000270171 | 1.832902789 | 0.004123108 | 0.821671795 |
| B0UYL0 | NADH dehydrogenase [ubiquinone] 1 alpha subcomplex subunit 10, mitochondrial OS=Danio rerio GN=ndufa10 PE=1 SV=1               | 2  | 1  | 0.168783835 | 1.276002768 | 0.335745917 | 1.186514327 |
| B0UYS0 | Keratin 15 OS=Danio rerio GN=krt15 PE=3 SV=1                                                                                   | 21 | 6  | 0.043179942 | 0.745722376 | 0.745224588 | 1.01263899  |
| B0V1B0 | Crystallin, beta B2 (Fragment) OS=Danio rerio GN=crybb2 PE=1 SV=1                                                              | 5  | 4  | 0.486561948 | 1.202644915 | 0.336552086 | 1.054139668 |
| B0V2T6 | Dedicator of cytokinesis 8 (Fragment) OS=Danio rerio GN=dock8 PE=1 SV=1                                                        | 5  | 2  | 9.00E-06    | 3.082634254 | 0.001575018 | 0.633627536 |
| B3DFP9 | Apolipoprotein A-II OS=Danio rerio GN=apoa2 PE=1 SV=1                                                                          | 9  | 6  | 0.006718816 | 3.185917948 | 0.000351659 | 0.695255584 |
| B3DFS9 | Myosin, heavy chain 11a, smooth muscle OS=Danio rerio GN=myh11a PE=1 SV=1                                                      | 8  | 3  | 0.077953498 | 2.408051753 | 0.283246106 | 1.062146286 |
| B3DIV6 | Acetyltransferase component of pyruvate dehydrogenase complex OS=Danio rerio                                                   | 3  | 1  | 0.011412847 | 3.825638775 | 0.600610442 | 0.797344822 |

|        |                                                                                                                                                                                       |    |    |             |             |             |             |  |  |
|--------|---------------------------------------------------------------------------------------------------------------------------------------------------------------------------------------|----|----|-------------|-------------|-------------|-------------|--|--|
|        | GN=dlat PE=1 SV=1                                                                                                                                                                     |    |    |             |             |             |             |  |  |
| B3DK63 | Zgc:194906 OS=Danio rerio                                                                                                                                                             | 5  | 3  | 0.005695477 | 1.633733301 | 0.017967392 | 0.79039822  |  |  |
| B3DKP3 | GN=zgc:194906 PE=2 SV=1<br>O-linked N-acetylglucosamine (GlcNAc) transferase (UDP-N-acetylglucosamine:polypeptide-N-acetylglucosaminyl transferase) OS=Danio rerio GN=ogt.1 PE=1 SV=1 | 3  | 1  | 0.005226977 | 1.694991562 | 0.03577641  | 0.821509008 |  |  |
| B8A478 | Zgc:171517 OS=Danio rerio                                                                                                                                                             | 12 | 8  | 0.002195783 | 2.338037202 | 0.319735152 | 0.875864247 |  |  |
| B8A4S2 | GN=zgc:171517 PE=1 SV=1<br>Testis-specific, 10 OS=Danio rerio                                                                                                                         | 5  | 5  | 0.001419496 | 3.047630231 | 7.75E-06    | 0.29375047  |  |  |
| B8A516 | GN=tsga.10 PE=1 SV=1<br>Tubulin alpha chain OS=Danio rerio                                                                                                                            | 31 | 1  | 0.003589725 | 1.903390824 | 0.041976903 | 0.860635065 |  |  |
| B8A565 | GN=tuba.1b PE=1 SV=1<br>Complement component 9 OS=Danio rerio                                                                                                                         | 9  | 5  | 0.986630299 | 0.966638304 | 0.190559524 | 0.927005657 |  |  |
| B8JHU4 | GN=c9 PE=1 SV=1<br>Actinin, alpha 1 OS=Danio rerio GN=actn1                                                                                                                           | 22 | 6  | 0.027969668 | 1.165814642 | 0.039668349 | 0.877638815 |  |  |
| B8JI08 | PE=1 SV=1<br>Oxoglutarate (alpha-ketoglutarate) dehydrogenase a (lipoamide) OS=Danio rerio GN=ogdha PE=1 SV=1                                                                         | 5  | 3  | 0.220158431 | 0.834086594 | 0.583946332 | 0.981102358 |  |  |
| B8JI18 | ATP-binding cassette, sub-family G (WHITE), member 2c OS=Danio rerio                                                                                                                  | 3  | 1  | 0.048527678 | 0.271640636 | 0.238801045 | 0.948976652 |  |  |
| B8JH7  | GN=abcg2c PE=1 SV=1<br>ADP-ribosylation factor-like protein 13B OS=Danio rerio GN=arl13b PE=3 SV=1                                                                                    | 2  | 2  | 0.000205299 | 5.080242955 | 0.000237469 | 0.623410578 |  |  |
| B8JIS1 | ATP synthase, H+-transporting, mitochondrial Fo complex, subunit B1 OS=Danio rerio GN=atp5f1 PE=1 SV=1                                                                                | 7  | 6  | 0.354307405 | 0.674884283 | 0.098082437 | 1.076263286 |  |  |
| B8JIS5 | Glutathione S-transferase mu tandem duplicate 3 OS=Danio rerio GN=gstm.3                                                                                                              | 4  | 1  | 0.092832887 | 1.241197148 | 0.181696965 | 0.920450842 |  |  |
| B8JIS8 | PE=1 SV=1<br>Glutathione S-transferase mu, tandem duplicate 1 OS=Danio rerio GN=gstm.1                                                                                                | 6  | 3  | 0.001382155 | 1.686228298 | 0.002081642 | 0.800451701 |  |  |
| B8JK95 | Elongation of very long chain fatty acids protein 6 OS=Danio rerio GN=elovl6l                                                                                                         | 2  | 1  | 0.792956696 | 0.986155826 | 0.057942232 | 1.32787753  |  |  |
| B8JKN6 | PE=3 SV=1<br>Peptidyl-prolyl cis-trans isomerase OS=Danio rerio GN=ppiaa PE=1 SV=1                                                                                                    | 7  | 5  | 0.620267587 | 0.889791217 | 0.531393873 | 1.032823584 |  |  |
| B8JKS7 | Sodium/potassium-transporting ATPase subunit alpha OS=Danio rerio                                                                                                                     | 21 | 5  | 0.071558147 | 1.171042381 | 0.068899017 | 0.906991745 |  |  |
| B8JKT0 | GN=atp1a1a.4 PE=1 SV=1<br>Sodium/potassium-transporting ATPase subunit alpha OS=Danio rerio                                                                                           | 7  | 2  | 0.476359105 | 0.858737618 | 0.08363329  | 1.152870988 |  |  |
| B8JKW4 | GN=atp1a1a.3 PE=1 SV=1<br>Complement component c3a, duplicate 1 OS=Danio rerio GN=c3a.1 PE=1 SV=1                                                                                     | 7  | 6  | 0.024989822 | 0.549199164 | 0.015296062 | 1.127405032 |  |  |
| B8JL43 | Serotransferrin OS=Danio rerio GN=tfa                                                                                                                                                 | 42 | 27 | 0.000719683 | 1.368793627 | 0.074048526 | 0.89551449  |  |  |
| B8JLJ3 | PE=1 SV=1<br>Tyrosine 3-monooxygenase/tryptophan 5-monooxygenase activation protein, zeta polypeptide OS=Danio rerio GN=ywhaz                                                         | 20 | 11 | 0.736862725 | 1.036309106 | 0.273629701 | 1.049265708 |  |  |
| B8JLR1 | PE=1 SV=1<br>Programmed cell death 6-interacting protein OS=Danio rerio GN=pcdc6ip                                                                                                    | 2  | 1  | 0.577299863 | 1.078964379 | 0.635983761 | 1.057742535 |  |  |
| D1GJ56 | Actinin alpha 3a OS=Danio rerio                                                                                                                                                       | 20 | 4  | 2.04E-06    | 5.079827332 | 0.00028357  | 0.606934621 |  |  |
| D3KYL0 | GN=actn3a PE=1 SV=1<br>Gephyrin a OS=Danio rerio GN=gphna                                                                                                                             | 9  | 6  | 0.000764571 | 2.82267011  | 0.03940634  | 0.874122148 |  |  |
| E7EXM8 | PE=1 SV=1<br>DEP domain-containing 5 OS=Danio rerio                                                                                                                                   | 5  | 2  | 0.017462733 | 2.289020718 | 0.189056951 | 0.922409092 |  |  |
| E7EXT3 | GN=depdc5 PE=1 SV=2<br>Alpha-1,4 glucan phosphorylase OS=Danio rerio GN=pygmb PE=1 SV=1                                                                                               | 41 | 10 | 0.00122297  | 1.467861056 | 0.864714015 | 1.00493399  |  |  |
| E7EYD0 | Myomesin 1a (skelemin) OS=Danio rerio                                                                                                                                                 | 18 | 9  | 1.08E-06    | 3.561003474 | 0.000502623 | 0.671800744 |  |  |
| E7EYE1 | GN=myom1a PE=4 SV=1<br>Myomesin 2a OS=Danio rerio                                                                                                                                     | 48 | 30 | 0.18674362  | 1.180493896 | 0.007538965 | 0.830922607 |  |  |
| E7EZI7 | GN=myom2a PE=1 SV=2<br>Discs, large homolog 5b (Drosophila), tandem duplicate 1 OS=Danio rerio                                                                                        | 5  | 2  | 0.00448138  | 2.178548848 | 0.004711897 | 0.795373213 |  |  |
| E7F004 | GN=dlg5b.1 PE=4 SV=2<br>Neogenin 1b OS=Danio rerio GN=neolb                                                                                                                           | 3  | 3  | 0.084516017 | 0.602737286 | 0.065188611 | 1.893442758 |  |  |
| E7F0A1 | PE=4 SV=2<br>Profilin OS=Danio rerio GN=pfn1                                                                                                                                          | 3  | 1  | 0.043582406 | 0.761969898 | 0.005800352 | 0.70789895  |  |  |
| E7F0E8 | SV=1<br>Exportin 1 (CRM1 homolog, yeast) a OS=Danio rerio GN=xpo1a PE=1 SV=2                                                                                                          | 2  | 2  | 0.465502413 | 0.723837665 | 0.171320194 | 1.722326343 |  |  |
| E7F1G8 | DEAD (Asp-Glu-Ala-Asp) box helicase 61 OS=Danio rerio GN=ddx61 PE=1 SV=1                                                                                                              | 3  | 2  | 0.19551109  | 0.440569789 | 0.175819292 | 0.820505274 |  |  |
| E7F263 | Cingulin a OS=Danio rerio GN=cgna PE=4                                                                                                                                                | 3  | 2  | 0.016810507 | 0.544422257 | 0.001551092 | 1.894315659 |  |  |
|        | SV=1                                                                                                                                                                                  |    |    |             |             |             |             |  |  |

|        |                                                                                                                   |    |    |   |             |             |             |             |
|--------|-------------------------------------------------------------------------------------------------------------------|----|----|---|-------------|-------------|-------------|-------------|
| E7F354 | 3-monoxygenase/tryptophan monoxygenase activation protein, gamma polypeptide 2 OS=Danio rerio GN=ywhag2 PE=1 SV=1 | 5- | 11 | 2 | 0.995193999 | 0.974472144 | 0.003635473 | 1.2339843   |
| E7F372 | RAS p21 protein activator (GTPase-activating protein) 1b OS=Danio rerio GN=rasa1b PE=4 SV=1                       |    | 3  | 2 | 0.001278679 | 10.32120834 | 0.026558657 | 0.389283409 |
| E7F4S5 | Uncharacterized protein OS=Danio rerio GN=si:cabz01069012.2 PE=4 SV=2                                             |    | 2  | 1 | 0.000980811 | 2.960429037 | 0.001721376 | 0.644973304 |
| E7F6E2 | RNA-binding motif protein 12B OS=Danio rerio GN=rhm12b PE=1 SV=2                                                  |    | 6  | 5 | 0.162467619 | 1.452487173 | 0.794756347 | 1.027479376 |
| E7F6I0 | Maestro heat-like repeat family member 1 OS=Danio rerio GN=mroh1 PE=1 SV=1                                        |    | 19 | 6 | 0.002332306 | 2.146737523 | 0.620701108 | 0.953557408 |
| E7F8T6 | Nicotinamide phosphoribosyltransferase a OS=Danio rerio GN=nampta PE=1 SV=1                                       |    | 3  | 2 | 0.078201046 | 0.782644475 | 0.064426818 | 1.245501908 |
| E7F9J5 | Multiple C2 domains, transmembrane 2b OS=Danio rerio GN=mctp2b PE=4 SV=2                                          |    | 2  | 2 | 0.008031888 | 0.472234675 | 0.021054056 | 1.476415542 |
| E7FAN6 | Kinesin family member 20Ba OS=Danio rerio GN=kif20ba PE=1 SV=2                                                    |    | 14 | 4 | 0.005544956 | 1.199083612 | 0.039851393 | 0.889139095 |
| E7FC32 | Tubulin beta chain OS=Danio rerio GN=tubb1 PE=1 SV=1                                                              |    | 16 | 6 | 0.62703924  | 0.968578794 | 0.64085634  | 0.978619939 |
| E7FCA3 | Myomesin 2b (Fragment) OS=Danio rerio GN=myom2b PE=1 SV=2                                                         |    | 12 | 7 | 4.29E-05    | 1.963169653 | 0.027514064 | 0.878170219 |
| E7FCW1 | Uncharacterized protein OS=Danio rerio GN=wu:fk65c09 PE=1 SV=2                                                    |    | 9  | 5 | 0.796590801 | 0.860466807 | 0.451289409 | 1.035933903 |
| E7FD91 | DEAD (Asp-Glu-Ala-Asp) box helicase 6 OS=Danio rerio GN=ddx6 PE=1 SV=2                                            |    | 6  | 4 | 0.95711962  | 0.963116726 | 0.05823176  | 0.915809876 |
| E7FE19 | 2',3'-cyclic nucleotide 3' phosphodiesterase OS=Danio rerio GN=cnp PE=1 SV=1                                      |    | 6  | 3 | 0.002509355 | 1.590010981 | 0.975349177 | 0.996143614 |
| E7FEY5 | CDC42-binding protein kinase alpha (DMPK-like) b OS=Danio rerio GN=cdc42bpab PE=3 SV=1                            |    | 8  | 3 | 8.71E-05    | 2.102348989 | 0.004451788 | 0.778656558 |
| E7FFI6 | Rap guanine nucleotide exchange factor (GEF) 5b OS=Danio rerio GN=rapgef5b PE=4 SV=1                              |    | 2  | 1 | 0.613317966 | 0.851611892 | 0.113971616 | 0.905600268 |
| E7FFZ3 | Si:dkey-46g23.2 OS=Danio rerio GN=si:dkey-46g23.2 PE=1 SV=2                                                       |    | 29 | 4 | 0.529072899 | 0.752859401 | 0.001754511 | 0.779443728 |
| E9QBP3 | Actin, beta 1 OS=Danio rerio GN=actb1 PE=1 SV=1                                                                   |    | 16 | 1 | 0.000850946 | 2.222138039 | 0.063751028 | 0.885089259 |
| E9QD79 | Clathrin heavy chain OS=Danio rerio GN=cltcb PE=1 SV=2                                                            |    | 16 | 2 | 0.000126292 | 2.440877003 | 0.00582322  | 0.66258381  |
| E9QDA3 | RAB44, member RAS oncogene family OS=Danio rerio GN=rab44 PE=4 SV=1                                               |    | 5  | 4 | 0.002917186 | 1.753529975 | 0.017584993 | 0.821827748 |
| E9QDE7 | Nicotinamide nucleotide transhydrogenase 2 (Fragment) OS=Danio rerio GN=nnt2 PE=1 SV=1                            |    | 6  | 5 | 0.032809939 | 0.815637997 | 0.285902581 | 0.949876667 |
| E9QDK0 | Si:dkey-51d8.1 OS=Danio rerio GN=si:dkey-51d8.1 PE=4 SV=2                                                         |    | 8  | 2 | 0.000264376 | 2.234742754 | 0.001886335 | 0.688773905 |
| E9QET4 | Tight junction protein 1a OS=Danio rerio GN=tjp1a PE=1 SV=2                                                       |    | 7  | 4 | 0.000407619 | 3.428040183 | 0.000951265 | 0.661670507 |
| E9QFH8 | Cold shock domain-containing E1, RNA-binding OS=Danio rerio GN=csde1 PE=1 SV=1                                    |    | 6  | 2 | 0.122303117 | 0.8070169   | 0.00908474  | 0.883846921 |
| E9QFR8 | Actinin, alpha 2b OS=Danio rerio GN=actn2b PE=1 SV=1                                                              |    | 9  | 1 | 0.044937318 | 1.872790092 | 0.008577528 | 0.796629391 |
| E9QGT5 | Dynein, axonemal, intermediate chain 1, paralog 1 OS=Danio rerio GN=dnai1.1 PE=4 SV=1                             |    | 2  | 1 | 0.9017742   | 0.964079566 | 0.164586593 | 0.898689602 |
| E9QHV8 | Si:ch211-258f1.3 OS=Danio rerio GN=si:ch211-258f1.3 PE=4 SV=3                                                     |    | 4  | 1 | 0.946460421 | 0.794506251 | 0.067175926 | 1.149733762 |
| E9QHZ3 | Si:dkey-84o3.7 OS=Danio rerio GN=si:dkey-84o3.7 PE=4 SV=1                                                         |    | 2  | 1 | 0.058057842 | 1.857973247 | 0.044311675 | 0.901746037 |
| E9QI03 | Uncharacterized protein OS=Danio rerio GN=si:dkey-222h21.7 PE=4 SV=2                                              |    | 6  | 1 | 0.140147902 | 0.750954718 | 0.221781895 | 0.925983379 |
| E9QIR9 | Ribosomal protein L10 (Fragment) OS=Danio rerio GN=rp110 PE=1 SV=1                                                |    | 2  | 1 | 0.00506705  | 615.0098614 | 0.098306726 | 1.228448267 |
| E9QJ12 | Neural cell adhesion molecule 1b OS=Danio rerio GN=ncam1b PE=1 SV=1                                               |    | 3  | 1 | 0.000816436 | 1.730769678 | 0.0638642   | 0.870776165 |
| E9QJ96 | 14-3-3 protein beta/alpha-A (Fragment) OS=Danio rerio GN=ywhaba PE=1 SV=1                                         |    | 18 | 1 | 0.727710257 | 1.038715536 | 0.028772744 | 0.883260935 |
| F1Q4P9 | Calcium-transporting ATPase OS=Danio rerio GN=atp2a3 PE=1 SV=2                                                    |    | 41 | 1 | 0.002850896 | 1.235080615 | 0.31187309  | 0.965615592 |
| F1Q4X3 | Si:dkey-222n6.2 (Fragment) OS=Danio rerio GN=si:dkey-222n6.2 PE=1 SV=2                                            |    | 6  | 2 | 0.047613916 | 1.120765116 | 0.812924217 | 0.988194039 |
| F1Q555 | Glycerol-3-phosphate dehydrogenase 2 (mitochondrial) OS=Danio rerio GN=gpd2 PE=1 SV=1                             |    | 7  | 3 | 0.002280095 | 1.728431434 | 0.001437523 | 0.701060689 |
| F1Q595 | SUN domain-containing ossification factor OS=Danio rerio GN=suco PE=4 SV=1                                        |    | 4  | 3 | 0.015826908 | 2.157674781 | 0.363327841 | 0.799877191 |
| F1Q5K6 | ATP-binding cassette, sub-family B (MDR/TAP), member 10 OS=Danio rerio GN=abcb10 PE=1 SV=1                        |    | 3  | 2 | 0.0023766   | 4.294165481 | 0.170940006 | 0.90619468  |



|        |                                                                                                                           |     |    |             |             |             |             |
|--------|---------------------------------------------------------------------------------------------------------------------------|-----|----|-------------|-------------|-------------|-------------|
| F1Q6F0 | Phosphorylase kinase, beta OS=Danio rerio<br>GN=phkb PE=1 SV=2                                                            | 2   | 2  | 0.055187606 | 0.762736557 | 0.661131281 | 0.965703128 |
| F1Q6K8 | Supervillin a OS=Danio rerio GN=svila<br>PE=4 SV=1                                                                        | 4   | 2  | 0.003495901 | 3.058184624 | 0.001003787 | 0.657773193 |
| F1Q6Y6 | Remodeling and spacing factor 1b, tandem<br>duplicate 1 OS=Danio rerio GN=rsf1b.1<br>PE=1 SV=2                            | 13  | 8  | 0.0002811   | 2.099950535 | 0.010212915 | 0.826746795 |
| F1Q7L0 | Vitellogenin 4 (Fragment) OS=Danio rerio<br>GN=vtg4 PE=1 SV=1                                                             | 356 | 8  | 3.49E-05    | 3.410229454 | 0.000825427 | 0.700593376 |
| F1Q7N8 | Calcium-transporting ATPase OS=Danio<br>rerio GN=si:dkey-28b4.8 PE=1 SV=2                                                 | 29  | 10 | 2.23E-05    | 1.96486752  | 0.007140528 | 0.839316158 |
| F1Q883 | 6-phosphogluconate dehydrogenase,<br>decarboxylating OS=Danio rerio GN=pgd<br>PE=1 SV=1                                   | 5   | 3  | 0.418171637 | 1.099052692 | 0.329415061 | 0.938271087 |
| F1Q8J4 | Acyl-CoA dehydrogenase, very long chain<br>OS=Danio rerio GN=acadvl PE=1 SV=1                                             | 10  | 3  | 0.000488639 | 2.82456085  | 0.050049835 | 0.735465452 |
| F1Q9F6 | LUC7-like 3 pre-mRNA-splicing factor<br>OS=Danio rerio GN=luc7l3 PE=1 SV=1                                                | 2   | 1  | 0.003183329 | 2.789638294 | 0.006779632 | 1.349541474 |
| F1QA15 | Gamma-tubulin complex component<br>OS=Danio rerio GN=tubgcp3 PE=1 SV=2                                                    | 2   | 2  | 0.851716844 | 1.085005904 | 0.203536962 | 0.670234765 |
| F1QAA0 | NIF3-like protein 1 OS=Danio rerio<br>GN=nif3l1 PE=1 SV=1                                                                 | 2   | 2  | 0.71866128  | 0.97233595  | 0.003086938 | 1.486214922 |
| F1QAJ7 | Solute carrier family 25 (mitochondrial<br>carrier; phosphate carrier), member 3b<br>OS=Danio rerio GN=slc25a3b PE=1 SV=1 | 8   | 5  | 0.857632123 | 1.006361701 | 0.131099333 | 0.930531445 |
| F1QBE4 | SAMM50 sorting and assembly machinery<br>component OS=Danio rerio GN=samm50<br>PE=1 SV=1                                  | 4   | 1  | 0.284235772 | 0.812809562 | 0.159821975 | 0.917327612 |
| F1QC34 | Ribophorin II OS=Danio rerio GN=rpn2<br>PE=1 SV=1                                                                         | 10  | 6  | 0.006178187 | 0.491285115 | 0.092059286 | 1.113386814 |
| F1QCD4 | Aspartate aminotransferase OS=Danio rerio<br>GN=got2b PE=1 SV=1                                                           | 15  | 5  | 0.417914151 | 1.053774792 | 0.28103672  | 1.063264784 |
| F1QCE3 | Peroxiredoxin 5 OS=Danio rerio GN=prdx5<br>PE=1 SV=1                                                                      | 2   | 2  | 0.046733505 | 0.07177286  | 0.524287782 | 1.231694146 |
| F1QCV9 | Multivesicular body subunit 12Ba<br>OS=Danio rerio GN=mvb12ba PE=4 SV=2                                                   | 3   | 1  | 0.159916949 | 0.831800011 | 0.850718982 | 0.988705225 |
| F1QDG9 | SET and MYND domain-containing 1a<br>OS=Danio rerio GN=smyd1a PE=1 SV=1                                                   | 6   | 3  | 0.000810198 | 3.190778921 | 0.078013086 | 0.724643677 |
| F1QEW2 | Si:dkey-183i3.5 OS=Danio rerio<br>GN=si:dkey-183i3.5 PE=1 SV=2                                                            | 7   | 2  | 0.028871795 | 0.468474583 | 0.270491496 | 1.192103304 |
| F1QF00 | Phosphoglucomutase 1 OS=Danio rerio<br>GN=pgm1 PE=1 SV=1                                                                  | 27  | 18 | 0.14825267  | 1.144223188 | 0.339916917 | 0.958948958 |
| F1QF37 | Si:dkey-16p6.1 (Fragment) OS=Danio rerio<br>GN=si:dkey-16p6.1 PE=4 SV=2                                                   | 5   | 1  | 0.019066154 | 1.378203356 | 0.035697408 | 0.841470623 |
| F1QF63 | Zgc:165518 OS=Danio rerio<br>GN=zgc:165518 PE=1 SV=1                                                                      | 27  | 11 | 0.00759405  | 2.162591393 | 7.99E-05    | 0.662099678 |
| F1QF64 | Si:ch211-67f13.8 OS=Danio rerio<br>GN=si:ch211-67f13.8 PE=4 SV=1                                                          | 2   | 1  | 0.000758695 | 5.27053513  | 0.01192303  | 0.598752008 |
| F1QFN1 | Uncharacterized protein OS=Danio rerio<br>GN=erc1b PE=1 SV=2                                                              | 9   | 5  | 0.385647381 | 0.891614133 | 0.009910677 | 0.872221412 |
| F1QGH3 | Heat shock cognate 70-kd protein, tandem<br>duplicate 1 OS=Danio rerio GN=hsp70.1<br>PE=3 SV=1                            | 12  | 1  | 0.948172386 | 0.998321136 | 0.054684682 | 0.920298988 |
| F1QGK0 | Glycerol-3-phosphate dehydrogenase<br>[NAD(+)] OS=Danio rerio GN=gpd1b<br>PE=1 SV=1                                       | 7   | 4  | 0.013668444 | 1.464256337 | 0.011607271 | 0.858679152 |
| F1QGK5 | Calcium-binding and coiled-coil domain 2<br>OS=Danio rerio GN=calcoco2 PE=4 SV=1                                          | 2   | 1  | 1.11E-06    | 3.551483107 | 0.000608321 | 0.557468217 |
| F1QHA9 | Neuropilin OS=Danio rerio GN=nrp1b<br>PE=3 SV=1                                                                           | 2   | 1  | 0.005108346 | 4.810755429 | 0.00110258  | 0.722691794 |
| F1QHR0 | Apolipoprotein A-IV b, tandem duplicate 1<br>OS=Danio rerio GN=apoa4b.1 PE=1 SV=1                                         | 6   | 2  | 0.179473731 | 0.806140383 | 0.911351212 | 1.005012215 |
| F1QIN9 | Uncharacterized protein OS=Danio rerio<br>PE=1 SV=2                                                                       | 3   | 1  | 0.007450988 | 0.700124142 | 0.08586237  | 1.147476334 |
| F1QJV7 | D-dopachrome tautomerase OS=Danio<br>rerio GN=ddt PE=1 SV=1                                                               | 2   | 1  | 0.002512874 | 0.386304219 | 0.203909747 | 1.198840542 |
| F1QK60 | Keratin 4 OS=Danio rerio GN=kr4 PE=3<br>SV=1                                                                              | 42  | 13 | 3.09E-05    | 2.438476495 | 0.002034582 | 0.737678951 |
| F1QKE3 | Membrane protein, palmitoylated 6a<br>(MAGUK p55 subfamily member 6)<br>OS=Danio rerio GN=mpp6a PE=1 SV=2                 | 8   | 7  | 0.168730013 | 0.512658433 | 0.000497194 | 0.681305339 |
| F1QKJ4 | FERM and PDZ domain-containing 3<br>OS=Danio rerio GN=frmpd3 PE=4 SV=2                                                    | 2   | 2  | 0.019291044 | 0.268156901 | 0.02057099  | 1.715297122 |
| F1QKS0 | Myosin VB OS=Danio rerio GN=myo5b<br>PE=4 SV=2                                                                            | 5   | 3  | 0.005932374 | 0.689317592 | 0.398171867 | 1.046585629 |
| F1QKU5 | Glutamine-fructose-6-phosphate<br>transaminase 2 OS=Danio rerio GN=gfpt2<br>PE=1 SV=1                                     | 4   | 1  | 0.287727515 | 0.934000594 | 0.176519802 | 1.064254124 |
| F1QMP9 | Si:dkey-13n15.2 OS=Danio rerio<br>GN=si:dkey-13n15.2 PE=4 SV=2                                                            | 3   | 1  | 0.140516266 | 2.817215129 | 0.696021523 | 1.022395589 |
| F1QP28 | Keratin 96 (Fragment) OS=Danio rerio<br>GN=kr96 PE=3 SV=1                                                                 | 20  | 1  | 0.474482778 | 0.909778179 | 0.109169401 | 0.925029838 |

|        |                                                                                                                        |     |    |             |             |             |             |
|--------|------------------------------------------------------------------------------------------------------------------------|-----|----|-------------|-------------|-------------|-------------|
| F1QPL7 | Propionyl CoA carboxylase, alpha polypeptide (Fragment) OS=Danio rerio GN=pcca PE=1 SV=1                               | 4   | 2  | 0.002550854 | 1.774975123 | 0.049402695 | 0.849080193 |
| F1QPU1 | Si:ch211-19719.2 OS=Danio rerio GN=si:ch211-19719.2 PE=4 SV=2                                                          | 4   | 2  | 0.033580483 | 4.437124033 | 0.017679559 | 0.791816953 |
| F1QQ05 | Vacuolar protein sorting 8 homolog (S. cerevisiae) OS=Danio rerio GN=vps8 PE=1 SV=1                                    | 7   | 3  | 2.92E-05    | 3.581028416 | 0.002087447 | 0.710187105 |
| F1QQQ3 | Vitellogenin 3, phosphoinositide OS=Danio rerio GN=vtg3 PE=1 SV=2                                                      | 61  | 52 | 0.000802062 | 2.175718402 | 0.037680002 | 0.771786803 |
| F1QQW9 | Elongation factor 1-alpha (Fragment) OS=Danio rerio GN=si:dkey-37o8.1 PE=1 SV=1                                        | 29  | 19 | 0.988164539 | 0.998374137 | 0.053343235 | 0.91438736  |
| F1QR21 | Keratin, type 1, gene c5 OS=Danio rerio GN=krt1-c5 PE=3 SV=2                                                           | 3   | 1  | 0.33259069  | 1.619903949 | 0.123498986 | 1.293101471 |
| F1QRM9 | Aminopeptidase OS=Danio rerio GN=npepps PE=1 SV=1                                                                      | 4   | 3  | 0.277526867 | 0.91614432  | 0.586184466 | 1.029215886 |
| F1QSE1 | Ventricular myosin heavy chain-like OS=Danio rerio GN=vmhcl PE=1 SV=1                                                  | 7   | 4  | 0.000397787 | 2.301580179 | 0.023709236 | 0.839980512 |
| F1QTB5 | Dolichyl-diphosphooligosaccharide--protein glycosyltransferase subunit 1 OS=Danio rerio GN=rpn1 PE=1 SV=1              | 7   | 4  | 0.00036825  | 1.604185244 | 0.560098602 | 0.964389726 |
| F1QU55 | Betaine--homocysteine S-methyltransferase 1 OS=Danio rerio GN=bhmt PE=1 SV=1                                           | 4   | 4  | 0.001165318 | 2.890400148 | 0.001380166 | 0.62721277  |
| F1QUE3 | Ubiquinol-cytochrome c reductase core protein I OS=Danio rerio GN=uqcr1 PE=1 SV=1                                      | 6   | 6  | 0.695012967 | 0.823268506 | 0.34051902  | 1.037406943 |
| F1QV15 | Vitellogenin 6 (Fragment) OS=Danio rerio GN=vtg6 PE=1 SV=1                                                             | 335 | 28 | 4.10E-05    | 3.37719704  | 0.000933787 | 0.691090927 |
| F1QV31 | Keratin 5 OS=Danio rerio GN=krt5 PE=1 SV=1                                                                             | 53  | 11 | 1.89E-05    | 2.37154304  | 0.003313417 | 0.779679307 |
| F1QVD5 | Si:dkeyp-34c12.1 OS=Danio rerio GN=si:dkeyp-34c12.1 PE=1 SV=1                                                          | 2   | 2  | 0.084707335 | 1.527221252 | 0.299845634 | 1.087654502 |
| F1QXE4 | Pentaxin OS=Danio rerio GN=crp PE=1 SV=2                                                                               | 3   | 2  | 0.087377556 | 0.876695959 | 0.627267004 | 0.968168037 |
| F1QXF4 | THO complex 2 OS=Danio rerio GN=thoc2 PE=4 SV=1                                                                        | 3   | 1  | 0.00198962  | 2.971489375 | 0.185449987 | 1.064150954 |
| F1QXV8 | Phosphoglycerate kinase OS=Danio rerio GN=pgk1 PE=1 SV=1                                                               | 18  | 15 | 0.170417467 | 0.625227819 | 0.01287402  | 0.883067765 |
| F1QYH7 | Glyoxylate reductase/hydroxypyruvate reductase b OS=Danio rerio GN=grhprb PE=1 SV=1                                    | 6   | 4  | 0.209363612 | 0.736293313 | 0.730766289 | 1.018311884 |
| F1QYX1 | Myosin X-like 3 OS=Danio rerio GN=mvo10i3 PE=4 SV=2                                                                    | 5   | 1  | 0.003066146 | 5.809272378 | 0.378822021 | 0.950981363 |
| F1QYZ6 | Pyruvate carboxylase OS=Danio rerio GN=pcxb PE=1 SV=1                                                                  | 12  | 1  | 0.005234743 | 1.686485653 | 0.041519891 | 0.828881075 |
| F1QZL6 | Glucose-6-phosphate isomerase OS=Danio rerio GN=gpia PE=1 SV=1                                                         | 9   | 7  | 0.635886018 | 1.053008303 | 0.752893793 | 1.01362829  |
| F1QZU7 | Aldehyde dehydrogenase 2 family (mitochondrial), tandem duplicate 2 OS=Danio rerio GN=aldh2.2 PE=1 SV=2                | 5   | 2  | 0.265938969 | 1.497642197 | 0.304033889 | 0.796993653 |
| F1R0A4 | Uncharacterized protein OS=Danio rerio GN=vps50 PE=1 SV=1                                                              | 2   | 2  | 0.007731915 | 0.494171328 | 0.399885309 | 1.078532753 |
| F1R2P4 | Uncharacterized protein OS=Danio rerio GN=tlr8a PE=3 SV=2                                                              | 4   | 2  | 0.002253785 | 5.892944035 | 0.02716397  | 0.396620104 |
| F1R319 | Solute carrier family 25 (mitochondrial carrier, oxoglutarate carrier), member 11 OS=Danio rerio GN=slc25a11 PE=1 SV=1 | 3   | 2  | 0.725639256 | 0.962794052 | 0.059259765 | 0.941375271 |
| F1R343 | NUAK family, SNF1-like kinase, 1a OS=Danio rerio GN=nuak1a PE=4 SV=1                                                   | 3   | 2  | 0.000127911 | 4.679229798 | 0.000659673 | 0.587805119 |
| F1R3J4 | Si:ch211-220f16.2 OS=Danio rerio GN=si:ch211-220f16.2 PE=1 SV=2                                                        | 11  | 4  | 0.186185159 | 1.173367189 | 0.005442682 | 0.785957071 |
| F1R535 | Membrane-associated guanylate kinase, WW and PDZ domain-containing 1a (Fragment) OS=Danio rerio GN=mag1a PE=1 SV=1     | 2   | 1  | 0.072427104 | 2.465097169 | 0.972653704 | 0.959909992 |
| F1R570 | Si:dkey-222h21.4 (Fragment) OS=Danio rerio GN=si:dkey-222h21.4 PE=4 SV=3                                               | 4   | 1  | 0.044266835 | 1.148353583 | 0.062508713 | 0.84919573  |
| F1R5D5 | Si:ch211-133j6.3 OS=Danio rerio GN=si:ch211-133j6.3 PE=1 SV=2                                                          | 3   | 2  | 0.095665463 | 0.718749402 | 0.330152933 | 0.945700168 |
| F1R5X0 | Alpha-1,4 glucan phosphorylase OS=Danio rerio GN=pygb PE=1 SV=1                                                        | 34  | 12 | 0.566218489 | 1.080631095 | 0.001835392 | 0.776490222 |
| F1R833 | Nebulin-related-anchoring protein OS=Danio rerio GN=nrap PE=4 SV=1                                                     | 3   | 2  | 0.054138051 | 5.071127947 | 0.005850109 | 0.65324878  |
| F1R889 | Myosin, heavy chain 9a, non-muscle OS=Danio rerio GN=myh9a PE=1 SV=2                                                   | 6   | 3  | 0.062220576 | 1.881133799 | 0.363507874 | 0.951759668 |
| F1R8D7 | Synaptotagmin-binding, cytoplasmic RNA-interacting protein,-like OS=Danio rerio GN=syncripl PE=1 SV=1                  | 2   | 1  | 0.131088805 | 0.089498552 | 0.014462869 | 1.971811391 |
| F1R8N2 | Sb:cb37 (Fragment) OS=Danio rerio GN=sb.cb37 PE=1 SV=2                                                                 | 13  | 1  | 0.00156278  | 1.564194317 | 0.009303089 | 0.836281933 |
| F1R8R0 | Si:zfos-1897c11.1 OS=Danio rerio                                                                                       | 2   | 1  | 0.351530723 | 0.503039816 | 0.004969176 | 0.754940881 |

|        |                                                                                                      |    |    |             |             |             |             |  |  |
|--------|------------------------------------------------------------------------------------------------------|----|----|-------------|-------------|-------------|-------------|--|--|
|        | GN=si:zfos-1897c11.1 PE=4 SV=3                                                                       |    |    |             |             |             |             |  |  |
| F1R8U0 | Keratin 94 OS=Danio rerio GN=krt94 PE=1 SV=1                                                         | 17 | 2  | 0.000278318 | 2.515043775 | 0.004505759 | 0.728421329 |  |  |
| F1R966 | Clathrin heavy chain OS=Danio rerio GN=cltca PE=1 SV=1                                               | 20 | 6  | 0.000130195 | 2.792523788 | 0.009247555 | 0.654519779 |  |  |
| F1R9V3 | Si:dkey-4p15.3 OS=Danio rerio GN=si:dkey-4p15.3 PE=1 SV=1                                            | 23 | 2  | 0.009324103 | 1.614787119 | 0.156093792 | 0.852996395 |  |  |
| F1RAV5 | Ribosomal protein S6 kinase OS=Danio rerio GN=rps6ka1 PE=1 SV=1                                      | 2  | 1  | 0.075789225 | 0.681434544 | 0.713812019 | 1.015283911 |  |  |
| F1RBF5 | HAUS augmin-like complex, subunit 5 OS=Danio rerio GN=haus5 PE=1 SV=1                                | 2  | 1  | 0.527267967 | 1.153172805 | 0.250483651 | 1.150221955 |  |  |
| F1RBS6 | Nucleoside diphosphate kinase OS=Danio rerio GN=nme2b.2 PE=1 SV=1                                    | 31 | 10 | 0.048140497 | 0.896474966 | 0.865093237 | 0.991316756 |  |  |
| F1RCJ3 | Regulating synaptic membrane exocytosis 1a OS=Danio rerio GN=rims1a PE=4 SV=2                        | 5  | 2  | 2.37E-05    | 5.958966309 | 0.000291332 | 0.586154671 |  |  |
| F1RD80 | Cadherin 17, LI cadherin (liver-intestine) OS=Danio rerio GN=cdh17 PE=1 SV=1                         | 3  | 2  | 0.013900971 | 1.876381841 | 0.001286951 | 0.717875009 |  |  |
| F1RDA6 | NADH dehydrogenase (ubiquinone) Fe-S protein 1 OS=Danio rerio GN=ndufs1 PE=1 SV=1                    | 3  | 3  | 0.758555472 | 0.649675996 | 0.005702337 | 0.82353697  |  |  |
| F1RDG4 | Si:dkey-222f2.1 OS=Danio rerio GN=si:dkey-222f2.1 PE=1 SV=1                                          | 23 | 8  | 0.000337306 | 2.284992204 | 0.008888176 | 0.812665351 |  |  |
| F1REE8 | Thyroid hormone receptor interactor 11 OS=Danio rerio GN=trip11 PE=1 SV=1                            | 17 | 11 | 0.000252502 | 1.336011537 | 0.017241312 | 0.844979675 |  |  |
| F1REK5 | Quinoid dihydropteridine reductase b2 OS=Danio rerio GN=qdprb2 PE=1 SV=1                             | 9  | 4  | 0.485116261 | 1.024278959 | 0.613085542 | 0.977596291 |  |  |
| F1REP2 | Zgc:171426 OS=Danio rerio GN=zgc:171426 PE=1 SV=1                                                    | 10 | 3  | 9.05E-06    | 2.309818397 | 0.000255968 | 0.711967149 |  |  |
| F6NHI0 | Glucose-6-phosphate 1-dehydrogenase OS=Danio rerio GN=g6pd PE=1 SV=1                                 | 2  | 1  | 0.543959964 | 0.750257633 | 0.002503958 | 0.717779369 |  |  |
| F6NI48 | Si:ch211-15j1.5 OS=Danio rerio GN=si:ch211-15j1.5 PE=4 SV=1                                          | 5  | 1  | 0.871819312 | 1.012463203 | 0.075985972 | 0.863495152 |  |  |
| F6NIT0 | Zgc:171226 OS=Danio rerio GN=zgc:171226 PE=3 SV=1                                                    | 2  | 1  | 0.06308285  | 1.425315631 | 0.911945255 | 0.98923078  |  |  |
| F6NMG5 | Component of oligomeric golgi complex 5 OS=Danio rerio GN=cog5 PE=1 SV=1                             | 2  | 1  | 5.39E-05    | 12.21889161 | 0.009033012 | 0.7636104   |  |  |
| F6NXM8 | Si:ch211-194e1.7 (Fragment) OS=Danio rerio GN=si:ch211-194e1.7 PE=4 SV=1                             | 2  | 2  | 0.08680898  | 1.636026237 | 0.014017641 | 0.865250835 |  |  |
| F6P9S6 | Si:ch211-243g18.2 OS=Danio rerio GN=si:ch211-243g18.2 PE=1 SV=1                                      | 15 | 9  | 0.00076498  | 1.701551203 | 0.048825448 | 0.871578974 |  |  |
| F6P9T1 | Kertain 95 OS=Danio rerio GN=krt95 PE=3 SV=1                                                         | 9  | 3  | 0.004845701 | 2.950107193 | 0.90712246  | 1.006948333 |  |  |
| F6PEQ5 | Si:dkey-222h21.9 OS=Danio rerio GN=si:dkey-222h21.9 PE=4 SV=1                                        | 5  | 1  | 0.015172712 | 1.171919821 | 0.075776016 | 0.871372102 |  |  |
| F8W246 | Ribosomal protein S13 OS=Danio rerio GN=rps13 PE=1 SV=1                                              | 2  | 2  | 0.111477199 | 2.173840162 | 0.757380557 | 1.017148825 |  |  |
| F8W2K0 | ELKS/RAB6-interacting/CAST family member 1a OS=Danio rerio GN=erc1a PE=1 SV=1                        | 6  | 1  | 0.209818532 | 0.605849369 | 0.02473767  | 0.942421251 |  |  |
| F8W2M8 | Tripeptidyl peptidase I OS=Danio rerio GN=tp1 PE=1 SV=1                                              | 2  | 2  | 0.01462111  | 0.223912505 | 0.154084794 | 1.370929888 |  |  |
| F8W371 | Ankyrin 3a OS=Danio rerio GN=ank3a PE=1 SV=1                                                         | 6  | 3  | 0.151678724 | 1.567521596 | 0.122158225 | 0.94577349  |  |  |
| F8W446 | Heterogeneous nuclear ribonucleoprotein A/Ba (Fragment) OS=Danio rerio GN=hnrnpaba PE=1 SV=1         | 3  | 2  | 0.774297867 | 0.973609943 | 0.08133378  | 1.192583802 |  |  |
| F8W4M7 | Aconitate hydratase, mitochondrial (Fragment) OS=Danio rerio GN=aco2 PE=1 SV=2                       | 27 | 15 | 0.000393314 | 1.850923396 | 0.028786658 | 0.837318689 |  |  |
| F8W5B8 | Alpha-1,4 glucan phosphorylase OS=Danio rerio GN=pygl PE=1 SV=1                                      | 31 | 11 | 0.027584133 | 1.32372576  | 0.068099327 | 0.864219334 |  |  |
| F8W5U2 | Tyrosyl-DNA phosphodiesterase 1 OS=Danio rerio GN=tdp1 PE=1 SV=1                                     | 3  | 3  | 0.001860906 | 0.197839773 | 0.026286954 | 1.802824219 |  |  |
| G1K2G6 | G patch domain-containing 1 OS=Danio rerio GN=gpatch1 PE=1 SV=2                                      | 3  | 1  | 0.000939253 | 4.660934982 | 0.20506481  | 0.813888341 |  |  |
| H0WEA8 | Si:dkey-84h14.2 (Fragment) OS=Danio rerio GN=si:dkey-84h14.2 PE=4 SV=2                               | 7  | 1  | 0.000290801 | 2.789859841 | 0.003410997 | 0.717956041 |  |  |
| H0WEN2 | Leucine-rich repeat (in FLII)-interacting protein 1a (Fragment) OS=Danio rerio GN=lrrfip1a PE=4 SV=1 | 2  | 1  | 0.029715842 | 2.977545649 | 0.198521169 | 1.091453001 |  |  |
| H0WFD4 | Uncharacterized protein OS=Danio rerio GN=si:dkey-156k2.3 PE=4 SV=3                                  | 3  | 1  | 0.783238902 | 1.022323429 | 0.378066632 | 0.935610622 |  |  |
| H9GX78 | Uncharacterized protein OS=Danio rerio PE=4 SV=1                                                     | 6  | 1  | 0.388626689 | 1.087844372 | 0.796377843 | 0.977558658 |  |  |
| H9GXQ9 | Protein-methionine sulfoxide oxidase mical3a OS=Danio rerio GN=mical3a PE=4 SV=2                     | 11 | 6  | 0.002488226 | 2.303097656 | 0.005471979 | 0.777921433 |  |  |
| I3IT32 | Collagen, type XII, alpha 1b (Fragment) OS=Danio rerio GN=coll2a1b PE=1 SV=2                         | 2  | 1  | 0.011831418 | 2.650583961 | 0.014873335 | 0.701189841 |  |  |
| K7DY17 | Si:ch211-242b18.1 OS=Danio rerio GN=si:ch211-242b18.1 PE=4 SV=1                                      | 28 | 19 | 9.99E-05    | 2.679702316 | 0.004819446 | 0.712909607 |  |  |
| K7DY31 | Si:dkey-4j21.2 OS=Danio rerio                                                                        | 4  | 1  | 0.000413771 | 2.701466535 | 0.001595887 | 0.680304916 |  |  |

|         |                                                                                                                                     |     |    |             |             |             |             |  |
|---------|-------------------------------------------------------------------------------------------------------------------------------------|-----|----|-------------|-------------|-------------|-------------|--|
|         | GN=si:dkey-4j21.2 PE=4 SV=1                                                                                                         |     |    |             |             |             |             |  |
| M9MM92  | Tyrosine-protein kinase OS=Danio rerio<br>GN=zap70 PE=3 SV=1                                                                        | 4   | 3  | 0.104801879 | 1.544431085 | 0.844646071 | 0.990190803 |  |
| O42363  | Apolipoprotein A-I OS=Danio rerio<br>GN=apoa1 PE=2 SV=1                                                                             | 14  | 9  | 0.000886217 | 1.568061479 | 0.030728783 | 0.917828881 |  |
| O57521  | Heat shock protein HSP 90-beta OS=Danio rerio<br>GN=hsp90ab1 PE=1 SV=2                                                              | 21  | 12 | 0.099551029 | 1.385441544 | 0.006766393 | 0.889288343 |  |
| O73872  | Superoxide dismutase [Cu-Zn] OS=Danio rerio<br>GN=sod1 PE=2 SV=1                                                                    | 2   | 2  | 0.455117623 | 1.169432933 | 0.286856489 | 0.945755255 |  |
| O93548  | Embryonic 1 beta-globin OS=Danio rerio<br>GN=bE1 PE=1 SV=1                                                                          | 11  | 1  | 0.000905408 | 0.609896788 | 0.021755069 | 1.163205144 |  |
| P17561  | Ependymin OS=Danio rerio<br>GN=epd PE=2 SV=2                                                                                        | 6   | 6  | 0.068479452 | 1.268006955 | 0.098785034 | 0.762229161 |  |
| P62084  | 40S ribosomal protein S7 OS=Danio rerio<br>GN=rps7 PE=2 SV=1                                                                        | 2   | 2  | 0.560862717 | 0.86576301  | 0.178174209 | 1.206766011 |  |
| P79735  | GTP-binding nuclear protein Ran OS=Danio rerio<br>GN=ran PE=2 SV=1                                                                  | 3   | 3  | 0.003331054 | 4.341699615 | 0.587531664 | 0.960287833 |  |
| Q08BA1  | ATP synthase subunit alpha OS=Danio rerio<br>GN=atp5a1 PE=1 SV=1                                                                    | 51  | 28 | 2.23E-05    | 2.181276486 | 0.000799404 | 0.703627833 |  |
| Q08CD8  | Ras homolog-enriched in brain-like 1 OS=Danio rerio<br>GN=rheb11 PE=1 SV=1                                                          | 2   | 2  | 0.075944926 | 0.022796606 | 0.179236868 | 2.221900973 |  |
| Q0P466  | tRNA wybutosine-synthesizing protein 2 homolog OS=Danio rerio<br>GN=trmt12 PE=2 SV=1                                                | 4   | 1  | 0.058610354 | 0.317113021 | 0.27574067  | 0.943863889 |  |
| Q1ECCX9 | Protein disulfide-isomerase A4 OS=Danio rerio<br>GN=pdia4 PE=1 SV=1                                                                 | 2   | 1  | 0.000708219 | 4.31499578  | 0.000531922 | 0.556956175 |  |
| Q1JPR9  | Rho GTPase activating protein 10 OS=Danio rerio<br>GN=arhgap10 PE=1 SV=1                                                            | 4   | 4  | 0.399203046 | 1.194199325 | 0.017984457 | 0.823515109 |  |
| Q1L907  | Glutathione S-transferase rho OS=Danio rerio<br>GN=gstr PE=1 SV=1                                                                   | 11  | 8  | 0.001915003 | 1.492690723 | 0.026146309 | 0.859058252 |  |
| Q1LUZ9  | Carboxylic ester hydrolase OS=Danio rerio<br>GN=ces3 PE=1 SV=1                                                                      | 8   | 3  | 0.002234411 | 1.699133391 | 0.061436496 | 1.189924633 |  |
| Q1LWN2  | Vitellogenin 1 OS=Danio rerio<br>GN=vtg1 PE=1 SV=1                                                                                  | 399 | 38 | 1.59E-05    | 3.294232454 | 0.000841267 | 0.686333823 |  |
| Q1LXJ1  | Keratin 17 OS=Danio rerio<br>GN=krt17 PE=1 SV=1                                                                                     | 28  | 7  | 0.000423081 | 1.366923383 | 0.008894908 | 0.854517157 |  |
| Q1LXJ9  | Keratin type 1 c19e OS=Danio rerio<br>GN=krt1c19e PE=1 SV=1                                                                         | 19  | 4  | 0.092961514 | 1.14951272  | 0.219631878 | 0.95134913  |  |
| Q1LXK0  | Keratin, type 1, gene 19d OS=Danio rerio<br>GN=krt1-19d PE=1 SV=1                                                                   | 17  | 7  | 0.005046665 | 1.426343136 | 0.081090602 | 0.924176443 |  |
| Q1LXN3  | InaD-like (Drosophila) OS=Danio rerio<br>GN=inadl PE=4 SV=2                                                                         | 5   | 2  | 8.97E-06    | 2.103936386 | 0.059210888 | 0.867757235 |  |
| Q1MTC4  | Vitellogenin 2 OS=Danio rerio<br>GN=vtg2 PE=1 SV=1                                                                                  | 213 | 65 | 0.00027527  | 3.269119548 | 0.003271108 | 0.69367795  |  |
| Q1MTI4  | Triosephosphate isomerase A OS=Danio rerio<br>GN=tpi1a PE=2 SV=1                                                                    | 13  | 2  | 0.004000775 | 1.62617736  | 0.136489623 | 0.907595048 |  |
| Q1RLR3  | Keratin 93 OS=Danio rerio<br>GN=krt93 PE=2 SV=1                                                                                     | 17  | 5  | 0.255198517 | 1.117200169 | 0.334985303 | 0.96025016  |  |
| Q29RA2  | Zgc:136908 OS=Danio rerio<br>GN=zgc:136908 PE=1 SV=1                                                                                | 11  | 4  | 0.069510978 | 2.891062299 | 0.004877762 | 0.733240743 |  |
| Q3B7P7  | Ubiquitin A-52 residue ribosomal protein fusion product 1 OS=Danio rerio<br>GN=uba52 PE=2 SV=1                                      | 7   | 4  | 0.478441465 | 0.904990986 | 0.095236813 | 0.914459918 |  |
| Q4QRF4  | Histone H3.2 OS=Danio rerio<br>GN=zgc:113984 PE=2 SV=3                                                                              | 5   | 1  | 2.21E-05    | 65.71863619 | 0.578270201 | 1.037560574 |  |
| Q503C7  | Alpha-1,4 glucan phosphorylase OS=Danio rerio<br>GN=pygma PE=1 SV=1                                                                 | 58  | 23 | 0.000442198 | 1.620136932 | 0.012911882 | 0.862887175 |  |
| Q561S7  | UDP-glucuronosyltransferase OS=Danio rerio<br>GN=ugt1ab PE=1 SV=1                                                                   | 3   | 1  | 0.533496024 | 0.899856317 | 0.963749961 | 0.982875961 |  |
| Q567N5  | Ribosomal protein L6 OS=Danio rerio<br>GN=rpl6 PE=1 SV=1                                                                            | 3   | 2  | 0.005607365 | 2.588224695 | 0.178568022 | 1.148567592 |  |
| Q568L5  | Alcohol dehydrogenase [NADP(+)] B OS=Danio rerio<br>GN=akr1a1b PE=2 SV=1                                                            | 4   | 3  | 0.121421886 | 1.161583208 | 0.085621973 | 0.901466965 |  |
| Q58EE9  | Glial fibrillary acidic protein OS=Danio rerio<br>GN=gfap PE=1 SV=2                                                                 | 11  | 5  | 0.001203286 | 2.018156962 | 0.270116659 | 0.930674445 |  |
| Q5BKV9  | Ribosomal protein L9 OS=Danio rerio<br>GN=rpl9 PE=1 SV=1                                                                            | 5   | 4  | 0.04885468  | 0.692900965 | 0.78636645  | 0.961106764 |  |
| Q5CZQ1  | Tyrosine 3-monooxygenase/tryptophan 5-monooxygenase activation protein, epsilon polypeptide 2 OS=Danio rerio<br>GN=ywhae2 PE=1 SV=1 | 9   | 1  | 0.257930039 | 0.568491311 | 0.785349353 | 1.010860985 |  |
| Q5MJ86  | Glyceraldehyde-3-phosphate dehydrogenase 2 OS=Danio rerio<br>GN=gapdh-2 PE=2 SV=1                                                   | 16  | 11 | 1.78E-06    | 2.57673543  | 0.005606784 | 0.801085016 |  |
| Q5RGJ8  | N-acetylglucosamine-1-phosphotransferase subunits alpha/beta OS=Danio rerio<br>GN=gnptab PE=1 SV=1                                  | 2   | 2  | 0.004197342 | 2.710434479 | 0.507476009 | 0.881045071 |  |
| Q5RH26  | ATP synthase subunit gamma OS=Danio rerio<br>GN=atp5c1 PE=1 SV=1                                                                    | 7   | 5  | 0.004127752 | 1.825159293 | 0.133543003 | 0.924083204 |  |
| Q5RHJ0  | Si:ch211-241j12.3 OS=Danio rerio<br>GN=si:ch211-241j12.3 PE=3 SV=2                                                                  | 3   | 2  | 0.024524215 | 3.94575861  | 0.036042966 | 0.854548622 |  |
| Q5RIC7  | Stathmin OS=Danio rerio<br>GN=stmn4 PE=3                                                                                            | 2   | 1  | 0.001188135 | 0.661255231 | 0.405710895 | 0.955701184 |  |

|        |                                                                                                                                         |    |    |             |             |             |             |  |  |
|--------|-----------------------------------------------------------------------------------------------------------------------------------------|----|----|-------------|-------------|-------------|-------------|--|--|
|        | SV=1                                                                                                                                    |    |    |             |             |             |             |  |  |
| Q5RIQ7 | Formin 1 OS=Danio rerio GN=fmn1 PE=4 SV=2                                                                                               | 2  | 2  | 0.402687117 | 1.201634722 | 0.428439326 | 0.950035083 |  |  |
| Q5SNY2 | Poly(A) polymerase alpha OS=Danio rerio GN=papola PE=1 SV=1                                                                             | 2  | 1  | 0.000122023 | 4.489148867 | 0.000164054 | 0.489142117 |  |  |
| Q5SPJ4 | Serine (Or cysteine) proteinase inhibitor, clade A (Alpha-1 antiproteinase, antitrypsin), member 1 OS=Danio rerio GN=serpina1 PE=1 SV=1 | 11 | 5  | 0.628168465 | 1.058732341 | 0.002194381 | 1.246818425 |  |  |
| Q5TYP7 | EH-domain-containing 3 OS=Danio rerio GN=ehd3 PE=1 SV=1                                                                                 | 2  | 1  | 0.391282011 | 1.202696755 | 0.219424707 | 1.103338327 |  |  |
| Q5TYR1 | RAD51 recombinase OS=Danio rerio GN=rad51 PE=1 SV=1                                                                                     | 2  | 1  | 0.153500142 | 1.178537856 | 0.011899463 | 0.770037932 |  |  |
| Q5U3A4 | Calcium-transporting ATPase OS=Danio rerio GN=atp2a1 PE=1 SV=1                                                                          | 70 | 12 | 0.002605095 | 1.286411498 | 0.048846239 | 0.931569922 |  |  |
| Q5XJ10 | Glyceraldehyde-3-phosphate dehydrogenase OS=Danio rerio GN=gapdh PE=2 SV=2                                                              | 32 | 22 | 0.054794774 | 0.86703215  | 0.311938188 | 0.960756926 |  |  |
| Q5XTP0 | Crystallin, gamma S1 OS=Danio rerio GN=crvgs1 PE=1 SV=1                                                                                 | 4  | 4  | 0.459525143 | 0.700707188 | 0.007118031 | 1.97866064  |  |  |
| Q5XTP1 | Crystallin, gamma S2 OS=Danio rerio GN=crvgs2 PE=1 SV=1                                                                                 | 3  | 2  | 0.022716022 | 1.528505551 | 0.053392285 | 1.174987682 |  |  |
| Q642H9 | 40S ribosomal protein S4, X isoform OS=Danio rerio GN=rps4x PE=2 SV=3                                                                   | 3  | 2  | 0.506063412 | 1.091603384 | 0.067675322 | 0.897007386 |  |  |
| Q64HD0 | Sex hormone binding globulin OS=Danio rerio GN=sbbg PE=1 SV=1                                                                           | 2  | 1  | 0.150275314 | 0.883965254 | 0.838229702 | 0.988999959 |  |  |
| Q66HV8 | ATP-dependent 6-phosphofructokinase OS=Danio rerio GN=pfkma PE=1 SV=1                                                                   | 4  | 1  | 0.011872538 | 0.570128707 | 0.283810444 | 1.146915464 |  |  |
| Q66I73 | Myosin light chain, phosphorylatable, fast skeletal muscle b OS=Danio rerio GN=mylpfb PE=1 SV=1                                         | 3  | 1  | 0.890425838 | 0.984167102 | 0.774672638 | 0.981804305 |  |  |
| Q68EH2 | Adenylate kinase isoenzyme 1 OS=Danio rerio GN=ak1 PE=1 SV=1                                                                            | 10 | 9  | 0.197177973 | 1.190986152 | 0.007252623 | 0.836058043 |  |  |
| Q6DBY5 | Ubiquitin-conjugating enzyme E2 variant 3 OS=Danio rerio GN=uevld PE=2 SV=1                                                             | 2  | 1  | 0.493968909 | 1.201188819 | 0.10525065  | 1.26920274  |  |  |
| Q6DEF9 | Socs1 protein OS=Danio rerio GN=socs1a PE=2 SV=1                                                                                        | 3  | 3  | 0.000153282 | 1.74175498  | 0.001072017 | 0.732649446 |  |  |
| Q6DGE9 | Protein unc-45 homolog B OS=Danio rerio GN=unc45b PE=1 SV=2                                                                             | 4  | 3  | 0.048775746 | 0.242608692 | 0.317355928 | 0.943932996 |  |  |
| Q6DGJ6 | Peroxiredoxin 2 OS=Danio rerio GN=prdx2 PE=1 SV=1                                                                                       | 4  | 3  | 0.015041887 | 2.519694365 | 0.742144404 | 1.012653426 |  |  |
| Q6DGK2 | L-lactate dehydrogenase B-B chain OS=Danio rerio GN=ldhbb PE=2 SV=1                                                                     | 15 | 2  | 0.00032094  | 0.399689205 | 0.014400265 | 1.20965268  |  |  |
| Q6DGU9 | Glutathione S-transferase kappa OS=Danio rerio GN=gstk1 PE=1 SV=1                                                                       | 3  | 1  | 0.424853361 | 1.104479406 | 0.05343266  | 0.870828863 |  |  |
| Q6DHB6 | Zgc:92533 OS=Danio rerio GN=krt17 PE=1 SV=1                                                                                             | 44 | 8  | 0.062984216 | 1.214792808 | 0.013113001 | 0.855104268 |  |  |
| Q6DHQ3 | N-acyl-aromatic-L-amino acid amidohydrolase (carboxylate-forming) B OS=Danio rerio GN=acy3.2 PE=2 SV=1                                  | 2  | 2  | 8.61E-05    | 10.9440779  | 3.92E-06    | 0.296158588 |  |  |
| Q6DHT4 | Aldehyde dehydrogenase 6 family, member A1 OS=Danio rerio GN=aldh6a1 PE=1 SV=1                                                          | 6  | 2  | 0.34532968  | 0.869881252 | 0.006186083 | 1.336645139 |  |  |
| Q6DHU3 | Keratin 97 OS=Danio rerio GN=krt97 PE=1 SV=1                                                                                            | 27 | 2  | 0.356962911 | 0.933684223 | 0.226070183 | 0.942164913 |  |  |
| Q6DI20 | Dipeptidyl peptidase 3 OS=Danio rerio GN=dpp3 PE=1 SV=1                                                                                 | 2  | 2  | 0.032126642 | 0.255059101 | 0.241323761 | 1.539700258 |  |  |
| Q6DRF3 | Proteasome subunit beta type OS=Danio rerio GN=psmb1 PE=1 SV=1                                                                          | 3  | 1  | 9.90E-05    | 2.766126431 | 0.000885996 | 0.645785605 |  |  |
| Q6GMJ1 | Carboxylic ester hydrolase (Fragment) OS=Danio rerio GN=ces2 PE=1 SV=1                                                                  | 7  | 3  | 0.167230811 | 1.433387612 | 0.315486293 | 0.894631495 |  |  |
| Q6GQM1 | Tubulin alpha chain OS=Danio rerio GN=tuba7l PE=1 SV=1                                                                                  | 11 | 1  | 0.671978926 | 1.05474097  | 0.134697369 | 1.145354454 |  |  |
| Q6GQM9 | Eno2 protein OS=Danio rerio GN=eno2 PE=1 SV=1                                                                                           | 8  | 3  | 0.011200779 | 3.279434574 | 0.274809719 | 0.952770384 |  |  |
| Q6GQN8 | Enoyl-[acyl-carrier-protein] reductase, mitochondrial OS=Danio rerio GN=mecr PE=2 SV=2                                                  | 5  | 3  | 0.011368545 | 1.898315532 | 0.042966634 | 0.844334578 |  |  |
| Q6IMW7 | Parvalbumin 4 OS=Danio rerio GN=pvalb4 PE=1 SV=1                                                                                        | 17 | 8  | 0.000446623 | 0.607436347 | 0.834774186 | 1.012157397 |  |  |
| Q6IQ59 | Ubiquinol-cytochrome c reductase core protein II OS=Danio rerio GN=uqcr2b PE=1 SV=1                                                     | 3  | 1  | 0.079997023 | 1.21685169  | 0.020000873 | 1.198201564 |  |  |
| Q6NSN5 | Adenylosuccinate synthetase isozyme 1 OS=Danio rerio GN=adss1 PE=1 SV=1                                                                 | 3  | 2  | 0.050920173 | 0.760709773 | 0.484539166 | 0.937571543 |  |  |
| Q6NUZ3 | Synaptotagmin binding, cytoplasmic RNA interacting protein OS=Danio rerio GN=syncrip PE=1 SV=1                                          | 5  | 2  | 0.000286268 | 2.144375284 | 0.033778314 | 0.763480169 |  |  |
| Q6NW90 | Tubulin beta chain OS=Danio rerio GN=tubb5 PE=1 SV=1                                                                                    | 32 | 2  | 0.000721757 | 1.355777998 | 0.231957321 | 0.948389699 |  |  |
| Q6NWC3 | Ribosomal protein S2 OS=Danio rerio GN=rps2 PE=1 SV=1                                                                                   | 5  | 4  | 0.113217372 | 0.749983344 | 0.016889854 | 0.90199252  |  |  |

|        |                                                                                                                                  |    |    |             |             |             |             |
|--------|----------------------------------------------------------------------------------------------------------------------------------|----|----|-------------|-------------|-------------|-------------|
| Q6NWF6 | Keratin, type II cytoskeletal 8 OS=Danio rerio GN=kr8 PE=1 SV=1                                                                  | 43 | 12 | 1.67E-05    | 2.54798914  | 0.001088413 | 0.721917403 |
| Q6NWX8 | UDP-glucose pyrophosphorylase 2b OS=Danio rerio GN=ugg2b PE=1 SV=1                                                               | 3  | 1  | 0.965709973 | 0.912222952 | 0.097432775 | 1.125972438 |
| Q6NX10 | Solute carrier family 25 (Mitochondrial carrier adenine nucleotide translocator), member 4 OS=Danio rerio GN=slc25a4 PE=1 SV=1   | 27 | 3  | 0.01220005  | 1.435507039 | 0.020846048 | 0.858406862 |
| Q6NXA4 | Interleukin enhancer-binding factor 3 homolog OS=Danio rerio GN=ilf3 PE=1 SV=2                                                   | 3  | 2  | 0.009291271 | 3.558767488 | 0.149472758 | 0.762970222 |
| Q6NYL7 | Zgc:77517 OS=Danio rerio GN=zgc:77517 PE=1 SV=1                                                                                  | 6  | 4  | 0.534513336 | 1.104499231 | 0.161978633 | 1.058342345 |
| Q6NYQ7 | Nicotinamide nucleotide transhydrogenase OS=Danio rerio GN=nnt PE=1 SV=1                                                         | 2  | 2  | 0.084671063 | 0.655836931 | 0.450243504 | 1.091069851 |
| Q6P043 | Fructose-bisphosphate aldolase OS=Danio rerio GN=aldoab PE=1 SV=1                                                                | 18 | 2  | 0.001889276 | 0.696657793 | 0.323700554 | 1.034199847 |
| Q6P0S5 | Alcohol dehydrogenase 8a OS=Danio rerio GN=adh8a PE=1 SV=1                                                                       | 10 | 4  | 0.037159345 | 1.204682752 | 0.360334972 | 1.037303527 |
| Q6P0V8 | Annexin OS=Danio rerio GN=anxa5b PE=1 SV=1                                                                                       | 5  | 2  | 0.00239324  | 1.841766346 | 0.000856687 | 1.535362373 |
| Q6P102 | Tyrosine 3-monooxygenase/tryptophan 5-monooxygenase activation protein, beta polypeptide like OS=Danio rerio GN=ywhab1 PE=1 SV=1 | 15 | 2  | 8.30E-05    | 3.088446428 | 0.013732356 | 0.633035476 |
| Q6P315 | Hedgehog acyltransferase-like, a OS=Danio rerio GN=hhatla PE=1 SV=1                                                              | 2  | 2  | 0.487603858 | 1.08094147  | 0.027219981 | 1.368225659 |
| Q6P3J5 | Eukaryotic translation elongation factor 2 OS=Danio rerio GN=eef2b PE=1 SV=1                                                     | 46 | 21 | 0.617241849 | 1.044111467 | 0.004688825 | 0.874011294 |
| Q6P3L3 | Heat shock protein 5 OS=Danio rerio GN=hspa5 PE=1 SV=1                                                                           | 29 | 16 | 0.004809494 | 1.423471119 | 0.000920424 | 0.722940828 |
| Q6P3L9 | Glutamate dehydrogenase 1 OS=Danio rerio GN=glud1b PE=1 SV=1                                                                     | 17 | 4  | 0.0054552   | 1.358315599 | 0.038103887 | 0.85847811  |
| Q6P6E0 | ATP synthase, H+ transporting, mitochondrial F0 complex, subunit g OS=Danio rerio GN=atp5l PE=1 SV=1                             | 6  | 3  | 0.502669866 | 1.095189074 | 0.359074391 | 0.914132059 |
| Q6P972 | Tubulin alpha chain OS=Danio rerio GN=tuba2 PE=1 SV=1                                                                            | 26 | 3  | 0.63187919  | 1.034477171 | 0.123484543 | 1.101961078 |
| Q6PC12 | Enolase 1, (Alpha) OS=Danio rerio GN=eno1a PE=1 SV=1                                                                             | 21 | 5  | 0.000956947 | 1.465270638 | 0.931186577 | 0.997430406 |
| Q6PC47 | Solute carrier family 25 (Mitochondrial carrier phosphate carrier), member 3, like OS=Danio rerio GN=slc25a3a PE=1 SV=1          | 10 | 4  | 0.734147428 | 1.024980636 | 0.774537959 | 1.010094435 |
| Q6PC77 | ATP synthase subunit d, mitochondrial OS=Danio rerio GN=atp5h PE=1 SV=1                                                          | 2  | 1  | 0.834148656 | 0.941716683 | 0.439910337 | 0.959296498 |
| Q6PC89 | Enolase 1b, (alpha) OS=Danio rerio GN=eno1b PE=1 SV=1                                                                            | 14 | 3  | 0.000736843 | 0.316969587 | 0.030394439 | 1.326495731 |
| Q6PC95 | Tubulin alpha chain OS=Danio rerio GN=tuba8l2 PE=1 SV=1                                                                          | 21 | 1  | 0.008665903 | 1.442646149 | 0.412852426 | 0.940270256 |
| Q6PE34 | Tubulin beta chain OS=Danio rerio GN=zgc:65894 PE=1 SV=1                                                                         | 35 | 4  | 2.52E-05    | 1.642671465 | 0.004714427 | 0.793002432 |
| Q6PGX4 | Heat shock cognate 70 OS=Danio rerio GN=hsc70 PE=1 SV=1                                                                          | 33 | 8  | 0.001166546 | 1.930866685 | 0.003172162 | 0.79633885  |
| Q6PHG2 | Hemopexin OS=Danio rerio GN=hpx PE=2 SV=2                                                                                        | 19 | 16 | 0.480012877 | 0.961955337 | 0.015768529 | 1.215893396 |
| Q6PHI8 | Tkt protein OS=Danio rerio GN=ktb PE=1 SV=1                                                                                      | 15 | 10 | 0.035016242 | 1.905200849 | 0.281839399 | 0.929054864 |
| Q6PI20 | Histone H3.3 OS=Danio rerio GN=h3f3a PE=2 SV=3                                                                                   | 5  | 1  | 5.48E-05    | 307.7699803 | 0.40573497  | 1.055086732 |
| Q6Q417 | Ribosomal protein L7 OS=Danio rerio GN=rpl7 PE=1 SV=1                                                                            | 4  | 3  | 0.043543676 | 1.412928732 | 0.023665297 | 0.81022902  |
| Q6TA36 | BHLH transcription factor OS=Danio rerio GN=her12 PE=2 SV=1                                                                      | 2  | 2  | 0.041254372 | 1.315908091 | 0.020279212 | 1.32991885  |
| Q6TGS5 | Tubulin alpha chain OS=Danio rerio GN=tuba4l PE=1 SV=1                                                                           | 22 | 4  | 0.000246171 | 1.662643764 | 0.096750009 | 0.899541961 |
| Q6TH14 | Enolase 1, (Alpha) OS=Danio rerio GN=eno3 PE=1 SV=1                                                                              | 35 | 21 | 0.829466967 | 1.008674895 | 0.16647633  | 1.063822051 |
| Q6TLG8 | Ribosomal protein S3 OS=Danio rerio GN=rps3 PE=1 SV=1                                                                            | 10 | 7  | 0.041976876 | 1.356495128 | 0.110245965 | 0.918875075 |
| Q6TNP9 | Tubulin alpha chain OS=Danio rerio GN=tuba8l1 PE=1 SV=1                                                                          | 16 | 1  | 0.014492869 | 1.486224275 | 0.691464209 | 1.022698421 |
| Q6TNT9 | Rab GDP dissociation inhibitor OS=Danio rerio GN=gdi2 PE=1 SV=1                                                                  | 18 | 9  | 0.007346892 | 2.335548811 | 0.122973884 | 0.932489381 |
| Q6VN46 | Myoglobin OS=Danio rerio GN=mb PE=2 SV=3                                                                                         | 10 | 5  | 0.000462043 | 1.628264339 | 0.008027651 | 0.85505371  |
| Q6XG62 | Protein S100 OS=Danio rerio GN=icn PE=1 SV=1                                                                                     | 3  | 3  | 0.004031089 | 0.163766183 | 0.036139212 | 1.575012564 |
| Q6ZM12 | Novel beta globin OS=Danio rerio GN=hbba2 PE=1 SV=1                                                                              | 8  | 6  | 0.040020967 | 1.416727158 | 0.014924708 | 0.886614451 |
| Q6ZM13 | Novel alpha globin OS=Danio rerio GN=hbba2 PE=1 SV=1                                                                             | 13 | 3  | 5.80E-05    | 0.465095913 | 0.000441012 | 1.207822528 |
| Q6ZM17 | Novel protein similar to zebrafish                                                                                               | 45 | 5  | 7.41E-06    | 0.460171999 | 0.000258752 | 1.25647928  |

|        |                                                                                                                                            |    |    |             |             |             |             |  |
|--------|--------------------------------------------------------------------------------------------------------------------------------------------|----|----|-------------|-------------|-------------|-------------|--|
|        | hemoglobin alpha-adult 1 (Hbaa1)<br>OS=Danio rerio GN=si:ch2111-5k11.8 PE=1<br>SV=1                                                        |    |    |             |             |             |             |  |
| Q6ZM23 | Cytochrome c oxidase subunit VIc<br>OS=Danio rerio GN=cox6c PE=1 SV=1                                                                      | 2  | 1  | 0.003961247 | 1.351776783 | 0.013314829 | 0.752366111 |  |
| Q6ZM60 | Calcium-transporting ATPase OS=Danio<br>rerio GN=atp2a2b PE=1 SV=1                                                                         | 40 | 1  | 0.005641305 | 1.159655981 | 0.401607733 | 0.972472816 |  |
| Q7SX99 | Fumarate hydratase, mitochondrial<br>OS=Danio rerio GN=fh PE=2 SV=1                                                                        | 7  | 6  | 0.037361195 | 1.58239353  | 0.070824596 | 0.820598128 |  |
| Q7SXL4 | Nucleoside diphosphate kinase OS=Danio<br>rerio GN=nme2b.2 PE=1 SV=1                                                                       | 40 | 15 | 0.000465017 | 0.780408592 | 0.646814983 | 1.014292204 |  |
| Q7SY23 | Delta-1-pyrroline-5-carboxylate<br>dehydrogenase, mitochondrial OS=Danio<br>rerio GN=aldh4a1 PE=2 SV=1                                     | 3  | 2  | 0.033408118 | 2.112568654 | 0.027486384 | 0.677544297 |  |
| Q7SYK1 | Queuine tRNA-ribosyltransferase catalytic<br>subunit 1 OS=Danio rerio GN=qtrt1 PE=2<br>SV=1                                                | 2  | 1  | 0.763081001 | 0.824304569 | 0.55539784  | 1.046618315 |  |
| Q7SYK7 | Aspartate aminotransferase OS=Danio rerio<br>GN=got2a PE=1 SV=1                                                                            | 18 | 8  | 0.001046727 | 1.968483559 | 0.108719458 | 0.883920458 |  |
| Q7SZ53 | Pentaxin OS=Danio rerio GN=crp2 PE=1<br>SV=2                                                                                               | 3  | 2  | 0.000930702 | 1.854680968 | 0.000376177 | 0.776761375 |  |
| Q7SZE3 | Lethal(2) giant larvae protein homolog 2<br>OS=Danio rerio GN=llgl2 PE=1 SV=1                                                              | 4  | 2  | 0.000695894 | 0.736385844 | 0.948867283 | 1.006095344 |  |
| Q7SZR0 | Ddc protein OS=Danio rerio GN=ddc PE=1<br>SV=1                                                                                             | 3  | 3  | 0.020101337 | 0.144098439 | 0.032551381 | 4.787868304 |  |
| Q7T1B0 | Embryonic globin beta e2 OS=Danio rerio<br>GN=hbb2 PE=1 SV=1                                                                               | 11 | 3  | 0.000452193 | 0.534999    | 0.04179889  | 1.1690983   |  |
| Q7T2F5 | N-ethylmaleimide sensitive fusion protein<br>attachment protein alpha OS=Danio rerio<br>GN=napab PE=1 SV=1                                 | 2  | 2  | 5.11E-05    | 4.8882624   | 0.455381939 | 1.049078419 |  |
| Q7T334 | Malate dehydrogenase OS=Danio rerio<br>GN=mdh2 PE=1 SV=1                                                                                   | 14 | 8  | 0.036567782 | 0.762327144 | 0.137132661 | 0.928045753 |  |
| Q7T356 | 14-3-3 protein beta/alpha-B OS=Danio<br>rerio GN=ywhabb PE=2 SV=1                                                                          | 19 | 4  | 0.238838357 | 1.160901676 | 0.020392197 | 0.903207992 |  |
| Q7T368 | Pyruvate dehydrogenase (Lipoamide) beta<br>OS=Danio rerio GN=pdhb PE=1 SV=1                                                                | 7  | 6  | 0.045313969 | 0.76189183  | 0.276234156 | 0.95191175  |  |
| Q7T3F0 | Tropomyosin 4 OS=Danio rerio GN=tpm4a<br>PE=1 SV=1                                                                                         | 3  | 1  | 0.009592566 | 1.335803656 | 0.048366582 | 0.894023442 |  |
| Q7T3G2 | Tyrosine 3-monooxygenase/tryptophan 5-<br>monooxygenase activation protein, eta<br>polypeptide OS=Danio rerio GN=ywhah<br>PE=1 SV=1        | 13 | 3  | 0.899340584 | 0.988757415 | 0.00139212  | 1.284262315 |  |
| Q7T3G4 | Phosphoglycerate mutase OS=Danio rerio<br>GN=pgam2 PE=1 SV=1                                                                               | 11 | 6  | 0.00038169  | 2.170889844 | 0.006192602 | 0.770744461 |  |
| Q7T3L3 | Chaperone protein GP96 OS=Danio rerio<br>GN=hsp90b1 PE=1 SV=1                                                                              | 13 | 8  | 0.001391568 | 3.305438598 | 0.002044765 | 0.735525656 |  |
| Q7ZT36 | Parvalbumin 3 OS=Danio rerio GN=pvalb3<br>PE=1 SV=1                                                                                        | 12 | 8  | 0.006817267 | 0.672119903 | 0.066035671 | 1.101378708 |  |
| Q7ZTS4 | Keratin, type I cytoskeletal 18 OS=Danio<br>rerio GN=krt18 PE=1 SV=2                                                                       | 19 | 11 | 2.03E-05    | 3.26388007  | 0.003286336 | 0.756125109 |  |
| Q7ZU29 | Nuclear pore complex protein Nup93<br>OS=Danio rerio GN=dye PE=2 SV=1                                                                      | 8  | 4  | 0.459062112 | 1.03009115  | 0.047580449 | 0.933407712 |  |
| Q7ZU67 | Eukaryotic translation initiation factor 4A,<br>isoform 1B OS=Danio rerio GN=eif4a1b<br>PE=1 SV=1                                          | 11 | 2  | 0.227574017 | 0.65442866  | 0.735128071 | 0.95017535  |  |
| Q7ZU99 | Transitional endoplasmic reticulum ATPase<br>OS=Danio rerio GN=vcp PE=1 SV=1                                                               | 30 | 17 | 0.0289591   | 1.229715687 | 0.038371729 | 0.900296615 |  |
| Q7ZUN7 | Ckmt1 protein OS=Danio rerio GN=ckmt1<br>PE=1 SV=1                                                                                         | 20 | 8  | 0.001208424 | 1.643904151 | 0.079783653 | 0.933624614 |  |
| Q7ZUU6 | Creatine kinase, mitochondrial 2a<br>(sarcomeric) OS=Danio rerio GN=ckmt2a<br>PE=1 SV=1                                                    | 20 | 7  | 0.002039721 | 1.628136352 | 0.007625887 | 0.827220552 |  |
| Q7ZUW8 | Aspartate aminotransferase OS=Danio rerio<br>GN=got1 PE=1 SV=1                                                                             | 17 | 11 | 0.005589907 | 1.765474858 | 0.012043001 | 0.844907924 |  |
| Q7ZUY3 | Histone H2AX OS=Danio rerio GN=h2afx<br>PE=2 SV=3                                                                                          | 2  | 1  | 0.233909708 | 1.269225548 | 0.469038363 | 1.048182492 |  |
| Q7ZVA4 | Protein S100 OS=Danio rerio<br>GN=s100a10b PE=1 SV=1                                                                                       | 4  | 3  | 0.000996651 | 2.088735985 | 0.007302372 | 0.780612535 |  |
| Q7ZVF9 | Actin, cytoplasmic 2 OS=Danio rerio<br>GN=actb PE=2 SV=2                                                                                   | 36 | 9  | 0.002470083 | 1.712344375 | 0.24896615  | 0.940627629 |  |
| Q7ZVG7 | Fgg protein OS=Danio rerio GN=fgg PE=1<br>SV=1                                                                                             | 4  | 3  | 0.56787325  | 1.075015322 | 0.547699375 | 0.968892814 |  |
| Q7ZVT2 | Pyruvate kinase OS=Danio rerio GN=pkma<br>PE=1 SV=1                                                                                        | 20 | 3  | 0.001108756 | 1.637411383 | 0.002602224 | 0.776421782 |  |
| Q7ZVY5 | Citrate synthase, mitochondrial OS=Danio<br>rerio GN=cs PE=2 SV=1                                                                          | 12 | 11 | 0.043500631 | 1.312489542 | 0.002828696 | 0.716682754 |  |
| Q7ZW20 | Tyrosine 3-monooxygenase/tryptophan 5-<br>monooxygenase activation protein, epsilon<br>polypeptide 1 OS=Danio rerio GN=ywhae1<br>PE=1 SV=1 | 12 | 1  | 0.431116026 | 0.690056218 | 0.765816694 | 0.98925404  |  |
| Q7ZW40 | USO1 homolog, vesicle docking protein<br>(Yeast) OS=Danio rerio GN=uso1 PE=1                                                               | 3  | 2  | 0.356105973 | 0.640638835 | 0.21154732  | 0.694248255 |  |

|        |                                                                                                                                          |    |    |             |             |             |             |  |  |
|--------|------------------------------------------------------------------------------------------------------------------------------------------|----|----|-------------|-------------|-------------|-------------|--|--|
|        | SV=1                                                                                                                                     |    |    |             |             |             |             |  |  |
| Q7ZW95 | Ribosomal protein L4 OS=Danio rerio<br>GN=rpl4 PE=1 SV=1                                                                                 | 14 | 9  | 0.001476417 | 1.406239911 | 0.067528361 | 0.894300004 |  |  |
| Q7ZZJ7 | Anion exchange protein OS=Danio rerio<br>GN=slc4a1a PE=1 SV=1                                                                            | 2  | 2  | 0.146884806 | 0.633084969 | 0.012166048 | 1.368059006 |  |  |
| Q801E6 | Malate dehydrogenase OS=Danio rerio<br>GN=mdh1aa PE=1 SV=1                                                                               | 19 | 17 | 0.457147532 | 0.954860496 | 0.823817394 | 1.008702306 |  |  |
| Q802C9 | Eukaryotic translation initiation factor 4A,<br>isoform 1A OS=Danio rerio GN=eif4a1a<br>PE=1 SV=1                                        | 14 | 3  | 0.002089353 | 0.528449291 | 0.526224925 | 0.966639905 |  |  |
| Q803B0 | Heat shock 60 protein 1 OS=Danio rerio<br>GN=hspd1 PE=1 SV=1                                                                             | 2  | 2  | 0.746750995 | 0.058035417 | 0.085444651 | 0.672808708 |  |  |
| Q803F6 | 40S ribosomal protein SA OS=Danio rerio<br>GN=rpsa PE=2 SV=1                                                                             | 5  | 3  | 0.485437275 | 0.830585074 | 0.0231706   | 1.149603615 |  |  |
| Q803M8 | Tryptophan 3-monooxygenase/tryptophan 5-<br>monooxygenase activation protein, zeta<br>polypeptide OS=Danio rerio GN=ywhaqb<br>PE=1 SV=1  | 16 | 5  | 0.433659007 | 0.784702891 | 0.565415948 | 1.021437987 |  |  |
| Q803Q7 | Fructose-bisphosphate aldolase OS=Danio<br>rerio GN=aldoaa PE=1 SV=1                                                                     | 27 | 7  | 0.013343892 | 0.777211552 | 0.522558017 | 1.023772263 |  |  |
| Q803T5 | Adenosylhomocysteinase OS=Danio rerio<br>GN=ahcy PE=1 SV=1                                                                               | 7  | 3  | 1.37E-05    | 1.992484208 | 0.003709031 | 0.737210021 |  |  |
| Q804W0 | Parvalbumin 1 OS=Danio rerio GN=pvalb1<br>PE=1 SV=1                                                                                      | 11 | 4  | 0.000716416 | 0.646484405 | 0.085245968 | 1.099127326 |  |  |
| Q8AW60 | Isovaleryl Coenzyme A dehydrogenase<br>OS=Danio rerio GN=ivd PE=1 SV=1                                                                   | 3  | 2  | 0.00285605  | 0.849289474 | 0.902100131 | 1.007703349 |  |  |
| Q8AWD0 | Vdac2 protein OS=Danio rerio GN=vdac2<br>PE=1 SV=1                                                                                       | 3  | 2  | 0.100355191 | 1.38694548  | 0.119130658 | 1.090345241 |  |  |
| Q8AX99 | Actinin alpha 3b OS=Danio rerio<br>GN=actn3b PE=1 SV=1                                                                                   | 22 | 8  | 8.57E-05    | 1.680810707 | 0.000796265 | 0.742072385 |  |  |
| Q8AY63 | Brain-subtype creatine kinase OS=Danio<br>rerio GN=ckbb PE=1 SV=1                                                                        | 30 | 6  | 0.001485078 | 1.190315142 | 0.136028562 | 0.936202908 |  |  |
| Q8JFV8 | Synaptic vesicle membrane protein VAT-1<br>homolog OS=Danio rerio GN=vat1 PE=2<br>SV=1                                                   | 8  | 4  | 0.05525548  | 1.41637277  | 0.852947551 | 0.991573707 |  |  |
| Q8JH70 | Fructose-bisphosphate aldolase C-B<br>OS=Danio rerio GN=aldocb PE=2 SV=1                                                                 | 3  | 1  | 0.002676081 | 3.396060841 | 0.00270008  | 0.740703067 |  |  |
| Q8JH71 | Fructose-bisphosphate aldolase B<br>OS=Danio rerio GN=aldob PE=2 SV=1                                                                    | 9  | 6  | 0.000122922 | 5.335342999 | 0.000139104 | 0.630349272 |  |  |
| Q8JH10 | Solute carrier family 25 (mitochondrial<br>carrier, adenine nucleotide translocator),<br>member 5 OS=Danio rerio GN=slc25a5<br>PE=1 SV=1 | 33 | 9  | 0.056476183 | 1.311956789 | 0.00291862  | 0.761877229 |  |  |
| Q8JH16 | Mediator of RNA polymerase II<br>transcription subunit 29 OS=Danio rerio<br>GN=med29 PE=2 SV=1                                           | 2  | 2  | 0.956299825 | 0.118313139 | 0.040468852 | 1.622792557 |  |  |
| Q90473 | Heat shock cognate 71 kDa protein<br>OS=Danio rerio GN=hspa8 PE=2 SV=1                                                                   | 25 | 1  | 0.000842911 | 4.380213574 | 0.015218121 | 0.615946824 |  |  |
| Q90485 | Hemoglobin subunit beta-2 OS=Danio rerio<br>GN=ba2 PE=1 SV=3                                                                             | 41 | 4  | 0.036539788 | 0.732176418 | 0.426863398 | 1.029037151 |  |  |
| Q90486 | Hemoglobin subunit beta-1 OS=Danio rerio<br>GN=ba1 PE=1 SV=3                                                                             | 48 | 1  | 0.002865321 | 0.600961956 | 0.013049543 | 1.139159769 |  |  |
| Q90487 | Hemoglobin subunit alpha OS=Danio rerio<br>GN=hbaa1 PE=2 SV=3                                                                            | 47 | 5  | 1.13E-05    | 0.471267363 | 0.000315173 | 1.237555166 |  |  |
| Q92005 | Elongation factor 1-alpha OS=Danio rerio<br>GN=eef1a PE=2 SV=1                                                                           | 30 | 4  | 0.002422058 | 1.444134069 | 0.007622427 | 0.884738699 |  |  |
| Q92051 | Carbonic anhydrase OS=Danio rerio<br>GN=cahz PE=1 SV=2                                                                                   | 3  | 2  | 0.003361774 | 1.952762788 | 0.017725083 | 0.793681719 |  |  |
| Q9DDL2 | MALT paracaspase 2 OS=Danio rerio<br>GN=malt2 PE=2 SV=1                                                                                  | 2  | 1  | 0.004248765 | 1.374726939 | 0.02537021  | 0.846090153 |  |  |
| Q9DDU5 | Glutathione S-transferase pi OS=Danio<br>rerio GN=gstp1 PE=1 SV=1                                                                        | 8  | 4  | 0.03582769  | 1.309854269 | 0.033715465 | 0.810021626 |  |  |
| Q9DEU2 | Sodium/potassium-transporting ATPase<br>subunit alpha OS=Danio rerio GN=atp1a3b<br>PE=1 SV=1                                             | 21 | 5  | 0.000221054 | 1.687816366 | 0.02404873  | 0.8811652   |  |  |
| Q9DGL6 | Sodium/potassium-transporting ATPase<br>subunit alpha OS=Danio rerio<br>GN=atp1a1a.1 PE=1 SV=1                                           | 31 | 3  | 2.62E-05    | 2.179936638 | 0.007343664 | 0.754756538 |  |  |
| Q918V0 | Parvalbumin-2 OS=Danio rerio GN=pvalb2<br>PE=3 SV=3                                                                                      | 20 | 8  | 0.016809747 | 0.74125975  | 0.125002754 | 1.089624509 |  |  |
| Q9MIY7 | Cytochrome c oxidase subunit 2 OS=Danio<br>rerio GN=mt-co2 PE=3 SV=1                                                                     | 3  | 3  | 0.003893551 | 0.456196025 | 0.098868091 | 1.339585377 |  |  |
| Q9PV90 | 60S acidic ribosomal protein P0 OS=Danio<br>rerio GN=rplp0 PE=2 SV=1                                                                     | 8  | 5  | 0.124454547 | 1.080411113 | 0.031121378 | 0.895086324 |  |  |
| Q9PVK4 | L-lactate dehydrogenase B-A chain<br>OS=Danio rerio GN=ldhba PE=2 SV=4                                                                   | 20 | 6  | 0.290124116 | 0.953519231 | 0.765468509 | 0.990627098 |  |  |
| Q9PVK5 | L-lactate dehydrogenase A chain<br>OS=Danio rerio GN=ldha PE=2 SV=3                                                                      | 19 | 9  | 0.277978412 | 0.940642274 | 0.685581846 | 1.015625756 |  |  |
| R4GE02 | Uncharacterized protein OS=Danio rerio<br>GN=si:ch211-113a14.11 PE=1 SV=1                                                                | 4  | 1  | 4.40E-05    | 3.775215033 | 0.060600852 | 0.827631396 |  |  |
| R4GED5 | Si:ch73-168d20.1 OS=Danio rerio<br>GN=si:ch73-168d20.1 PE=4 SV=1                                                                         | 10 | 4  | 9.34E-05    | 1.533189618 | 0.000991853 | 0.706120978 |  |  |



|        |                                                                                                                             |    |    |             |             |             |             |
|--------|-----------------------------------------------------------------------------------------------------------------------------|----|----|-------------|-------------|-------------|-------------|
| R4GEU2 | Si:dkey-4p15.3 (Fragment) OS=Danio rerio<br>GN=si:dkey-4p15.3 PE=1 SV=6                                                     | 6  | 1  | 0.008491427 | 2.103925359 | 0.159899966 | 0.755753925 |
| R4GF04 | Si:dkey-187i8.2 OS=Danio rerio<br>GN=si:dkey-187i8.2 PE=4 SV=1                                                              | 9  | 6  | 3.09E-05    | 5.487848542 | 0.00041039  | 0.629119817 |
| U3JAX6 | Si:dkey-61p9.9 OS=Danio rerio<br>GN=si:dkey-61p9.9 PE=4 SV=1                                                                | 5  | 4  | 0.857466237 | 1.008162861 | 0.000900608 | 0.90503395  |
| X1WBJ0 | Tripartite motif-containing 65 OS=Danio rerio<br>GN=trim65 PE=4 SV=1                                                        | 2  | 1  | 0.420522825 | 0.784366998 | 0.602987771 | 1.087271191 |
| X1WBT0 | Si:dkey-105h12.2 OS=Danio rerio<br>GN=si:dkey-105h12.2 PE=1 SV=1                                                            | 13 | 2  | 0.201135369 | 1.051969833 | 0.976834372 | 1.001967576 |
| X1WC44 | Si:ch211-212c13.8 (Fragment) OS=Danio rerio<br>GN=si:ch211-212c13.8 PE=1 SV=1                                               | 18 | 3  | 0.001105132 | 1.341858328 | 0.45057968  | 0.968204158 |
| X1WEB9 | Dedicator of cytokinesis 9b OS=Danio rerio<br>GN=dock9b PE=1 SV=1                                                           | 14 | 11 | 0.00043563  | 1.909749743 | 0.0024002   | 0.753136649 |
| X1WGM2 | Si:ch211-181d7.1 (Fragment) OS=Danio rerio<br>GN=si:ch211-181d7.1 PE=4 SV=1                                                 | 7  | 2  | 0.00053201  | 3.434483294 | 0.001665965 | 0.748754086 |
| X1WHD9 | Immunoglobulin-like and fibronectin type III domain-containing 1, tandem duplicate 1<br>OS=Danio rerio GN=igfn1.1 PE=1 SV=2 | 13 | 8  | 0.101426228 | 1.157952388 | 0.537350829 | 0.970822191 |

**Table S3-2.** Comparative proteins significantly changed with HFD and AOS supplemented (ratios of HFD/NFD and HAOS/HFD after 35 days feeding period). with upregulated proteins having expressions  $\geq 1.2$ , red;

downregulated proteins having expressions  $\leq 0.83$ , green. Cut-off: Anova  $p < 0.05$ , peptide count  $\geq 2$ , unique peptide  $\geq 1$ .

| UniProt<br>Accession No. | Symbols               | Protein name                                                                                     | HFD/NFD<br>Fold Change | HAOS/HFD<br>Fold Change |
|--------------------------|-----------------------|--------------------------------------------------------------------------------------------------|------------------------|-------------------------|
| A0A0R4ICC8               | STOML2                | stomatatin (EPB72)-like 2                                                                        | 16.54                  | 0.52                    |
| F6NMG5                   | COG5                  | component of oligomeric golgi complex 5                                                          | 12.22                  | 0.76                    |
| Q6DHFQ3                  | ACY3.2                | aspartoacylase (aminocyclase) 3, tandem duplicate 2                                              | 10.94                  | 0.30                    |
| E7F372                   | RASA1B                | RAS p21 protein activator (GTPase activating protein) 1b                                         | 10.32                  | 0.39                    |
| F1RCJ3                   | RIMS1A                | regulating synaptic membrane exocytosis 1a                                                       | 5.96                   | 0.59                    |
| F1R2P4                   | TLR8A                 | toll-like receptor 8a                                                                            | 5.89                   | 0.40                    |
| R4GF04                   | SI:DKEY-<br>187I8.2   | si:dkey-187i8.2                                                                                  | 5.49                   | 0.63                    |
| Q8JH71                   | ALDOB                 | aldolase b, fructose-bisphosphate                                                                | 5.34                   | 0.63                    |
| F1QF64                   | SI:CH211-<br>67F13.8  | si:ch211-67f13.8                                                                                 | 5.27                   | 0.60                    |
| B8JIH7                   | ARL13B                | ADP-ribosylation factor-like 13b                                                                 | 5.08                   | 0.62                    |
| D1GJ56                   | ACTN3A                | actinin alpha 3a                                                                                 | 5.08                   | 0.61                    |
| F1QHA9                   | NRP1B                 | neuropilin 1b                                                                                    | 4.81                   | 0.72                    |
| F1R343                   | NUAK1A                | NUAK family, SNF1-like kinase, 1a                                                                | 4.68                   | 0.59                    |
| Q5SNY2                   | PAPOLA                | poly(A) polymerase alpha                                                                         | 4.49                   | 0.49                    |
| F1QPU1                   | SI:CH211-<br>197L9.2  | si:ch211-197l9.2                                                                                 | 4.44                   | 0.79                    |
| Q90473                   | HSPA8                 | Heat shock cognate 71 kDa protein                                                                | 4.38                   | 0.62                    |
| Q1ECX9                   | PDIA4                 | protein disulfide isomerase family A, member 4                                                   | 4.31                   | 0.56                    |
| A0A0G2KL83               | -                     | Uncharacterized protein                                                                          | 3.76                   | 0.60                    |
| A0A0R4IVB0               | HSPA8                 | heat shock protein 8-like                                                                        | 3.62                   | 0.64                    |
| F1QQ05                   | VPS8                  | vacuolar protein sorting 8 homolog (S. cerevisiae)                                               | 3.58                   | 0.71                    |
| E7EYD0                   | MYOM1A                | myomesin 1a (skelemin)                                                                           | 3.56                   | 0.67                    |
| F1QGK5                   | CALCOCO2              | calcium binding and coiled-coil domain 2                                                         | 3.55                   | 0.56                    |
| A2CEI6                   | PIWIL2                | piwi-like RNA-mediated gene silencing 2                                                          | 3.55                   | 0.59                    |
| A0A0R4IQ19               | CKAP5                 | cytoskeleton associated protein 5                                                                | 3.47                   | 0.67                    |
| X1WGM2                   | SI:CH211-<br>181D7.1  | si:ch211-181d7.1                                                                                 | 3.43                   | 0.75                    |
| E9QET4                   | TJPIA                 | tight junction protein 1a                                                                        | 3.43                   | 0.66                    |
| F1Q7L0                   | VTG4                  | vitellogenin 4                                                                                   | 3.41                   | 0.70                    |
| Q8JH70                   | ALDOCB                | aldolase C, fructose-bisphosphate, b                                                             | 3.40                   | 0.74                    |
| F1QV15                   | VTG6                  | vitellogenin 6                                                                                   | 3.38                   | 0.69                    |
| Q7T3L3                   | HSP90B1               | heat shock protein 90, beta (grp94), member 1                                                    | 3.31                   | 0.74                    |
| A0A0R4IGN3               | PDIA3                 | protein disulfide isomerase family A, member 3                                                   | 3.31                   | 0.73                    |
| Q1LWN2                   | VTG1                  | vitellogenin 1                                                                                   | 3.29                   | 0.69                    |
| Q1MTC4                   | VTG2                  | vitellogenin 2                                                                                   | 3.27                   | 0.69                    |
| Q7ZTS4                   | KRT18                 | keratin 18                                                                                       | 3.26                   | 0.76                    |
| A4QPA0                   | ME3                   | malic enzyme 3, NADP(+)-dependent, mitochondrial                                                 | 3.24                   | 0.73                    |
| A0A0R4IQE4               | SI:CH211-<br>196F19.1 | si:ch211-196f19.1                                                                                | 3.21                   | 0.75                    |
| B3DFP9                   | APOA2                 | apolipoprotein A-II                                                                              | 3.19                   | 0.70                    |
| A8E7T3                   | SI:DKEY-<br>51D8.2    | si:dkey-51d8.2                                                                                   | 3.14                   | 0.65                    |
| A0A0G2L6I6               | NADP                  | Isocitrate dehydrogenase                                                                         | 3.14                   | 0.66                    |
| A0A0R4IIW8               | SI:DKEY-<br>71L4.4    | si:dkey-71l4.4                                                                                   | 3.12                   | 0.66                    |
| Q6P102                   | YWHABL                | tyrosine 3-monooxygenase/tryptophan 5-monooxygenase<br>activation protein, beta polypeptide like | 3.09                   | 0.63                    |
| B0V2T6                   | DOCK8                 | dedicator of cytokinesis 8                                                                       | 3.08                   | 0.63                    |
| F1Q6K8                   | SVILA                 | supervillin a                                                                                    | 3.06                   | 0.66                    |
| B8A4S2                   | TSGA10                | testis specific, 10                                                                              | 3.05                   | 0.29                    |
| A0A0R4IUS8               | SI:DKEY-<br>29M1.2    | si:dkey-29m1.2                                                                                   | 2.99                   | 0.65                    |

|            |                   |                                                                                                      |      |      |
|------------|-------------------|------------------------------------------------------------------------------------------------------|------|------|
| A0A0R4IJ29 | SI:DKEY-14O6.2    | si:dkey-14o6.2                                                                                       | 2.98 | 0.67 |
| A0A0R4IHC4 | SI:CH211-76M11.3  | si:ch211-76m11.3                                                                                     | 2.98 | 0.66 |
| A0A0R4IP16 | SI:CH211-39D8.1   | si:ch211-39d8.1                                                                                      | 2.97 | 0.66 |
| E7F4S5     | LOC103910258      | protein NLRC3-like                                                                                   | 2.96 | 0.64 |
| A0A0R4IHI2 | SI:CH211-246B8.1  | si:ch211-246b8.1                                                                                     | 2.96 | 0.66 |
| A0A0R4IB01 | SI:DKEY-165E24.1  | si:dkey-165e24.1                                                                                     | 2.95 | 0.67 |
| A0A0R4IN16 | SI:DKEY-264F17.2  | si:dkey-264f17.2                                                                                     | 2.94 | 0.65 |
| A5WUN8     | PLPPR5A           | phospholipid phosphatase related 5a                                                                  | 2.94 | 0.71 |
| A0A0R4IY80 | SI:DKEY-264F17.1  | si:dkey-264f17.1                                                                                     | 2.93 | 0.68 |
| F1QU55     | BHMT              | betaine-homocysteine methyltransferase                                                               | 2.89 | 0.63 |
| A0A0R4II04 | SI:DKEY-29J8.1    | si:dkey-29j8.1                                                                                       | 2.80 | 0.70 |
| F1R966     | CLTCA             | clathrin, heavy chain a (Hc)                                                                         | 2.79 | 0.65 |
| H0WEA8     | SI:DKEY-84H14.2   | si:dkey-84h14.2                                                                                      | 2.79 | 0.72 |
| Q6DRF3     | PSMB1             | proteasome subunit beta 1                                                                            | 2.77 | 0.65 |
| A0A0R4IDU6 | TIAM1B            | T-cell lymphoma invasion and metastasis 1b                                                           | 2.73 | 0.70 |
| K7DY31     | SI:DKEY-4J21.2    | si:dkey-4j21.2                                                                                       | 2.70 | 0.68 |
| K7DY17     | SI:CH211-242B18.1 | si:ch211-242b18.1                                                                                    | 2.68 | 0.71 |
| A8E7G6     | PRDX3             | peroxiredoxin 3                                                                                      | 2.66 | 0.73 |
| I3IT32     | COL12A1B          | collagen, type XII, alpha 1b                                                                         | 2.65 | 0.70 |
| Q5MJ86     | GAPDHS            | glyceraldehyde-3-phosphate dehydrogenase, spermatogenic                                              | 2.58 | 0.80 |
| Q6NWF6     | KRT8              | keratin 8                                                                                            | 2.55 | 0.72 |
| A0A0R4IJS2 | SI:CH211-59D8.2   | si:ch211-59d8.2                                                                                      | 2.55 | 0.69 |
| F1R8U0     | KRT94             | keratin 94                                                                                           | 2.52 | 0.73 |
| E9QD79     | CLTCB             | clathrin, heavy chain b (Hc)                                                                         | 2.44 | 0.66 |
| F1QK60     | KRT4              | keratin 4                                                                                            | 2.44 | 0.74 |
| A0A0R4IYW7 | SI:DKEY-27N6.1    | si:dkey-27n6.1                                                                                       | 2.42 | 0.65 |
| A0A0R4IUS1 | SI:CH211-223G7.6  | si:ch211-223g7.6                                                                                     | 2.40 | 0.76 |
| A0A0R4ISX6 | P4HB              | prolyl 4-hydroxylase, beta polypeptide                                                               | 2.38 | 0.75 |
| F1QV31     | KRT5              | keratin 5                                                                                            | 2.37 | 0.78 |
| A0A0H2UKK8 | PUS7              | pseudouridylylase 7 (putative)                                                                       | 2.34 | 0.74 |
| A0A0R4ITY7 | SI:CH211-76M11.8  | si:ch211-76m11.8                                                                                     | 2.34 | 0.69 |
| F1REP2     | ZGC:171426        | zgc:171426                                                                                           | 2.31 | 0.71 |
| H9GXQ9     | MICAL3A           | microtubule-associated monooxygenase, calponin and LIM domain containing 3a                          | 2.30 | 0.78 |
| F1RDG4     | SI:DKEY-222F2.1   | si:dkey-222f2.1                                                                                      | 2.28 | 0.81 |
| A0A0R4IP08 | SI:DKEY-211I20.2  | si:dkey-211i20.2                                                                                     | 2.26 | 0.69 |
| B0R068     | ATP1A1B           | ATPase, Na <sup>+</sup> /K <sup>+</sup> transporting, alpha 1b polypeptide                           | 2.25 | 0.76 |
| E9QDK0     | SI:DKEY-51D8.1    | si:dkey-51d8.1                                                                                       | 2.23 | 0.69 |
| A0A0R4IDL5 | SI:CH211-232D10.1 | si:ch211-232d10.1                                                                                    | 2.20 | 0.70 |
| Q08BA1     | ATP5A1            | ATP synthase, H <sup>+</sup> transporting, mitochondrial F1 complex, alpha subunit 1, cardiac muscle | 2.18 | 0.70 |
| Q9DGL6     | ATP1A1A.1         | ATPase, Na <sup>+</sup> /K <sup>+</sup> transporting, alpha 1a polypeptide, tandem duplicate 1       | 2.18 | 0.75 |
| E7EZI7     | DLG5B.1           | discs, large homolog 5b (Drosophila), tandem duplicate 1                                             | 2.18 | 0.80 |

|            |                   |                                                                                       |      |      |
|------------|-------------------|---------------------------------------------------------------------------------------|------|------|
| F1QQQ3     | VTG3              | vitellogenin 3, phosvitinless                                                         | 2.18 | 0.77 |
| Q7T3G4     | PGAM2             | phosphoglycerate mutase 2 (muscle)                                                    | 2.17 | 0.77 |
| F1QF63     | ZGC:165518        | zgc:165518                                                                            | 2.16 | 0.66 |
| Q6NUZ3     | SYNCRIP           | synaptotagmin binding, cytoplasmic RNA interacting protein                            | 2.14 | 0.76 |
| Q7SY23     | ALDH4A1           | aldehyde dehydrogenase 4 family, member A1                                            | 2.11 | 0.68 |
| E7FEY5     | SI:CH211-89P3.3   | si:ch211-89p3.3                                                                       | 2.10 | 0.78 |
| F1Q6Y6     | RSF1B.1           | remodeling and spacing factor 1b, tandem duplicate 1                                  | 2.10 | 0.83 |
| Q7ZVA4     | S100A10B          | S100 calcium binding protein A10b                                                     | 2.09 | 0.78 |
| A0A0N4STW3 | C3B               | complement component c3b, tandem duplicate 1                                          | 2.01 | 0.77 |
| Q803T5     | AHCY              | adenosylhomocysteinase                                                                | 1.99 | 0.74 |
| Q92051     | CAHZ              | carbonic anhydrase                                                                    | 1.95 | 0.79 |
| A0A0R4IP53 | TAOK1B            | TAO kinase 1b                                                                         | 1.93 | 0.73 |
| Q6PGX4     | HSC70             | heat shock cognate 70                                                                 | 1.93 | 0.80 |
| X1WEB9     | DOCK9B            | dedicator of cytokinesis 9b                                                           | 1.91 | 0.75 |
| A2CEZ0     | SI:DKEY-251I10.1  | si:dkey-251i10.1                                                                      | 1.90 | 0.79 |
| F1RD80     | CDH17             | cadherin 17, LI cadherin (liver-intestine)                                            | 1.88 | 0.72 |
| E9QFR8     | ACTN2B            | actinin, alpha 2b                                                                     | 1.87 | 0.80 |
| A0A0R4IZD9 | SI:CH211-205A14.7 | si:ch211-205a14.7                                                                     | 1.86 | 0.72 |
| Q7SZ53     | CRP2              | C-reactive protein 2                                                                  | 1.85 | 0.78 |
| B0UYE9     | GRIPAP1           | GRIP1 associated protein 1                                                            | 1.83 | 0.82 |
| A0JMP4     | ATP2A1            | ATPase, Ca <sup>++</sup> transporting, cardiac muscle, fast twitch 1 like             | 1.81 | 0.80 |
| E9QDA3     | RAB44             | Rab44, member ras oncogene family                                                     | 1.75 | 0.82 |
| Q6DEF9     | SOCS1A            | Suppressor of cytokine signaling 1a                                                   | 1.74 | 0.73 |
| F1Q555     | GPD2              | Glycerol-3-phosphate dehydrogenase 2 (mitochondrial)                                  | 1.73 | 0.70 |
| A0A0R4IL12 | SI:DKEY-92C21.    | Si:dkey-92c21.1                                                                       | 1.70 | 0.74 |
| B3DKP3     | OGT.1             | O-linked n-acetylglucosamine (glcnac) transferase, tandem duplicate 1                 | 1.69 | 0.82 |
| F1QYZ6     | PCXB              | Pyruvate carboxylase b                                                                | 1.69 | 0.83 |
| B8JIS8     | GSTM.1            | Glutathione s-transferase mu, tandem duplicate 1                                      | 1.69 | 0.80 |
| Q8AX99     | ACTN3B            | Actinin alpha 3b                                                                      | 1.68 | 0.74 |
| A0A0R4IGP6 | PKMA              | Pyruvate kinase, muscle, a                                                            | 1.66 | 0.80 |
| Q6PE34     | ZGC:65894         | Zgc:65894                                                                             | 1.64 | 0.79 |
| Q7ZVT2     | PKMA              | Pyruvate kinase, muscle, a                                                            | 1.64 | 0.78 |
| B3DK63     | ZGC:194906        | Zgc:194906                                                                            | 1.63 | 0.79 |
| Q7ZUU6     | CKMT2A            | Creatine kinase, mitochondrial 2a (sarcomeric)                                        | 1.63 | 0.83 |
| R4GED5     | SI:CH73-168D20.1  | Si:ch73-168d20.1                                                                      | 1.53 | 0.71 |
| A0A0A0MPS0 | SI:DKEY-222H21.2  | Si:dkey-222h21.2                                                                      | 1.51 | 0.79 |
| A8WGC6     | ATP5B             | ATP synthase, H <sup>+</sup> transporting, mitochondrial F1 complex, beta polypeptide | 1.48 | 0.83 |
| Q6P3L3     | HSPA5             | heat shock protein 5                                                                  | 1.42 | 0.72 |
| Q6Q417     | RPL7              | ribosomal protein L7                                                                  | 1.41 | 0.81 |
| Q6ZM23     | COX6C             | cytochrome c oxidase subunit VIc                                                      | 1.35 | 0.75 |
| Q7ZVY5     | CS                | citrate synthase                                                                      | 1.31 | 0.72 |
| Q9DDU5     | GSTP1             | glutathione S-transferase pi 1                                                        | 1.31 | 0.81 |
| A0A0R4IDW8 | SI:DKEY-193I10.4  | si:dkey-193i10.4                                                                      | 1.30 | 0.80 |
| Q6XG62     | ICN               | Ictacalcin(icn)                                                                       | 0.16 | 1.58 |
| F8W5U2     | TDP1              | Tyrosyl-DNA phosphodiesterase 1                                                       | 0.20 | 1.80 |
| A0A0R4IA89 | SI:CH211-203C5.3  | Si:ch211-203c5.3                                                                      | 0.23 | 4.45 |
| A0A0R4IFF1 | CYP2AA7           | Cytochrome P450, family 2, subfamily AA, polypeptide 7                                | 0.26 | 1.83 |
| F1QKJ4     | FRMPD3            | FERM and PDZ domain-containing 3                                                      | 0.27 | 1.72 |
| Q6PC89     | ENO1B             | Enolase 1b, (alpha)                                                                   | 0.32 | 1.33 |
| Q6DGK2     | LDHBB             | L-lactate dehydrogenase B-B chain                                                     | 0.40 | 1.21 |
| Q6ZM17     | SI:CH211-5K11.8   | Novel protein similar to zebrafish hemoglobin alpha-adult 1 (Hbaa1)                   | 0.46 | 1.26 |
| Q6ZM13     | SI:CH211-         | Novel alpha globin                                                                    | 0.47 | 1.21 |

|        |        |                                       |      |      |
|--------|--------|---------------------------------------|------|------|
|        | 5K11.6 |                                       |      |      |
| Q7SZR0 | DDC    | Dopa decarboxylase(ddc) protein       | 0.47 | 4.79 |
| Q90487 | HBAA1  | Hemoglobin subunit alpha              | 0.47 | 1.24 |
| E7F9J5 | MCTP2B | Multiple C2 domains, transmembrane 2b | 0.47 | 1.48 |
| E7F263 | CGNA   | Cingulin a                            | 0.54 | 1.89 |
| F1Q9F6 | LUC7L3 | LUC7-like 3 pre-mRNA-splicing factor  | 2.79 | 1.35 |
| Q6P0V8 | ANXA5B | Annexin                               | 1.84 | 1.54 |
| Q6TA36 | HER12  | BHLH transcription factor             | 1.32 | 1.33 |
| E7F0A1 | PFN1   | Profilin                              | 0.76 | 0.71 |

**Table S4.** Biological functional profiling of proteins regulated by HFD and AOS supplementation in zebrafish using Ingenuity Pathway Analysis (IPA).

| Category                                                                                      | Functional Annotation                              | p-value  | Activation z-score | Molecules                                                                                                                                                                                                                                                                                                          |
|-----------------------------------------------------------------------------------------------|----------------------------------------------------|----------|--------------------|--------------------------------------------------------------------------------------------------------------------------------------------------------------------------------------------------------------------------------------------------------------------------------------------------------------------|
| Cancer, Gastrointestinal Disease, Hepatic System Disease, Organismal Injury and Abnormalities | Hepatitis B virus-related hepatocellular carcinoma | 1.43E-10 | --                 | ALDH4A1, ALDOB, ANXA5, BHMT, HSP90B1, HSPA5, HSPA8                                                                                                                                                                                                                                                                 |
|                                                                                               | Hepatitis C virus-related hepatocellular carcinoma | 1.26E-06 | --                 | ANXA5, HSP90B1, HSPA5, HSPA8                                                                                                                                                                                                                                                                                       |
|                                                                                               | Gastroesophageal adenocarcinoma                    | 1.96E-06 | --                 | ALDOB, BHMT, GSTP1, HSP90B1, NUAK1, PKM, TUBB4A                                                                                                                                                                                                                                                                    |
|                                                                                               | Esophageal adenocarcinoma                          | 3.73E-06 | --                 | ALDOB, BHMT, GSTP1, HSP90B1, NUAK1, TUBB4A                                                                                                                                                                                                                                                                         |
|                                                                                               | Liver cancer                                       | 2.16E-05 | --                 | ALDH4A1, ALDOB, ANXA5, ATP5F1A, BHMT, CDH17, GSTP1, HSP90B1, HSPA5, HSPA8, PKM, PSMB1, SOCS1, TUBB4A                                                                                                                                                                                                               |
|                                                                                               | Liver carcinoma                                    | 3.09E-05 | --                 | ALDH4A1, ALDOB, ANXA5, BHMT, CDH17, HSP90B1, HSPA5, HSPA8, PKM, PSMB1, SOCS1, TUBB4A                                                                                                                                                                                                                               |
|                                                                                               | Hepatic steatosis                                  | 5.84E-05 | 0.068              | ATP5F1A, DDC, GSTP1, PC, PKM, S100A10, S100A4                                                                                                                                                                                                                                                                      |
| Cancer, Organismal Injury and Abnormalities                                                   | Malignant solid tumor                              | 2.79E-09 | -1.673             | AHCY, ALDH4A1, ALDOB, ALDOC, ANXA5, ATP1A1, ATP2A1, ATP5F1A, ATP5F1B, BHMT, CALCOCO2, CDH17, CGN, CKAP5, DOCK8, GSTM3, GSTP1, HSP90B1, HSPA5, HSPA8, KRT15, KRT18, KRT8, NUAK1, OGT, P4HB, PC, PDIA3, PIWIL2, PKM, PSMB1, RPL7, RSF1, S100A10, S100A4, SOCS1, SYNCRIP, TDP1, TIAM1, TJP1, TLR8, TUBB4A, YWHAZ      |
|                                                                                               | Cancer                                             | 1.16E-08 | 0.398              | AHCY, ALDH4A1, ALDOB, ALDOC, ANXA5, ATP1A1, ATP2A1, ATP5F1A, ATP5F1B, BHMT, CALCOCO2, CDH17, CGN, CKAP5, DDC, DOCK8, GSTM3, GSTP1, HSP90B1, HSPA5, HSPA8, KRT15, KRT18, KRT8, NUAK1, OGT, P4HB, PC, PDIA3, PIWIL2, PKM, PSMB1, RPL7, RSF1, S100A10, S100A4, SOCS1, SYNCRIP, TDP1, TIAM1, TJP1, TLR8, TUBB4A, YWHAZ |
|                                                                                               | Solid tumor                                        | 1.39E-08 | -1.319             | AHCY, ALDH4A1, ALDOB, ALDOC, ANXA5, ATP1A1, ATP2A1, ATP5F1A, ATP5F1B, BHMT, CALCOCO2, CDH17, CGN, CKAP5, DOCK8, GSTM3, GSTP1, HSP90B1, HSPA5, HSPA8, KRT15,                                                                                                                                                        |

|                                     |                                            |          |        |                                                                                                                                                                                                                                              |
|-------------------------------------|--------------------------------------------|----------|--------|----------------------------------------------------------------------------------------------------------------------------------------------------------------------------------------------------------------------------------------------|
| Inflammatory Response and Apoptosis |                                            |          |        | KRT18, KRT8, NUAK1, OGT, P4HB, PC, PDIA3, PIWIL2, PKM, PSMB1, RPL7, RSF1, S100A10, S100A4, SOCS1, SYNCRIP, TDP1, TIAM1, TJP1, TLR8, TUBB4A, YWHAZ                                                                                            |
|                                     | Tumorigenesis of tissue                    | 7.29E-08 | -1.01  | Actn3, ALDH4A1, ALDOB, ALDOC, ANXA5, ATP1A1, ATP2A1, ATP5F1B, BHMT, CALCOCO2, CDH17, CLTC, DOCK8, GSTP1, HSP90B1, HSPA5, HSPA8, KRT18, NUAK1, P4HB, PC, PDIA3, PKM, PSMB1, RPL7, RSF1, S100A10, S100A4, SOCS1, SYNCRIP, TIAM1, TUBB4A, YWHAZ |
|                                     | Inflammation of organ                      | 2.01E-05 | 0.242  | AHCY, ANXA5, ATP1A1, CA13, GSTP1, HSP90B1, HSPA5, KRT15, KRT8, P4HB, PDIA3, PKM, PSMB1, S100A10, S100A4, SOCS1, TLR8, TUBB4A                                                                                                                 |
|                                     | Necrosis                                   | 2.34E-05 | 1.485  | ANXA5, ATP1A1, ATP2A1, ATP5F1A, CKAP5, CLTC, CS, DOCK8, GSTP1, HSP90B1, HSPA5, HSPA8, KRT18, KRT8, NUAK1, OGT, P4HB, PDIA3, PKM, PRDX3, PSMB1, RPL7, S100A10, S100A4, SOCS1, SVIL, TIAM1, YWHAZ                                              |
|                                     | Cell viability                             | 4.01E-05 | -2.601 | ANXA5, CKAP5, DOCK8, GSTP1, HBZ, HSP90B1, HSPA5, NUAK1, OGT, P4HB, PDIA3, PIWIL2, PKM, RSF1, S100A4, SOCS1, SVIL, TUBB4A, YWHAZ                                                                                                              |
|                                     | Chronic inflammatory disorder              | 0.00038  | --     | BHMT, CA13, HSP90B1, HSPA5, HSPA8, LDHB, P4HB, PDIA3, PKM, PSMB1, S100A10, S100A4, SOCS1                                                                                                                                                     |
|                                     | Apoptosis                                  | 0.000443 | 0.268  | ANXA5, ATP1A1, ATP2A1, CKAP5, CLTC, CS, GSTP1, HSPA5, HSPA8, KRT18, KRT8, NUAK1, OGT, P4HB, PDIA3, PKM, PRDX3, PSMB1, S100A10, S100A4, SOCS1, TIAM1, YWHAZ                                                                                   |
|                                     | Inflammation of body cavity                | 0.000702 | 0.537  | ANXA5, GSTP1, HSP90B1, HSPA5, KRT8, P4HB, PDIA3, PKM, S100A4, SOCS1, TLR8                                                                                                                                                                    |
|                                     | Inflammation of absolute anatomical region | 0.00148  | 0.199  | ANXA5, CA13, GSTP1, HSP90B1, HSPA5, KRT8, P4HB, PDIA3, PKM, S100A4, SOCS1, TLR8                                                                                                                                                              |

**Table S5.** The top canonical pathways profiling of significant proteins ( $p < 0.05$ ) regulated by HFD and AOS supplementation in zebrafish using Ingenuity Pathway Analysis (IPA).

| <b>Ingenuity Canonical Pathways</b>          | <b>-log(p-value)</b> | <b>Ratio</b> | <b>Molecules</b>                          |
|----------------------------------------------|----------------------|--------------|-------------------------------------------|
| Glycolysis I                                 | 7.69                 | 0.192        | ALDOB, PKM, PGAM2, GAPDHS, ALDOC          |
| Gluconeogenesis I                            | 7.69                 | 0.192        | ALDOB, ME3, PGAM2, GAPDHS, ALDOC          |
| Unfolded protein response                    | 4.47                 | 0.0714       | HSPA8, HSP90B1, P4HB, HSPA5               |
| Mitochondrial Dysfunction                    | 3.61                 | 0.0292       | PRDX3, ATP5F1B, Cox6c, GPD2, ATP5F1A      |
| Aldosterone Signaling in Epithelial Cells    | 3.58                 | 0.0287       | HSPA8, HSP90B1, PDIA3, HSPA5, AHCY        |
| Sertoli Cell-Sertoli Cell Junction Signaling | 3.48                 | 0.0273       | TJP1, ACTN2, CGN, Actn3, TUBB4A           |
| Sucrose Degradation V (Mammalian)            | 3.43                 | 0.222        | ALDOB, ALDOC                              |
| Calcium Transport I                          | 3.33                 | 0.2          | ANXA5, ATP2A1                             |
| Glucocorticoid Receptor Signaling            | 3.02                 | 0.0173       | HSPA8, HSP90B1, KRT8, KRT18, HSPA5, KRT15 |
| Aryl Hydrocarbon Receptor Signaling          | 2.92                 | 0.0282       | ALDH4A1, HSP90B1, GSTM3, GSTP1            |
| Huntington's Disease Signaling               | 2.85                 | 0.0198       | HSPA8, ATP5F1B, ATP5F1A, CLTC, HSPA5      |
| Remodeling of Epithelial Adherens Junctions  | 2.82                 | 0.0435       | ACTN2, Actn3, TUBB4A                      |
| Endoplasmic Reticulum Stress Pathway         | 2.67                 | 0.0952       | HSP90B1, HSPA5                            |
| Germ Cell-Sertoli Cell Junction Signaling    | 2.54                 | 0.0222       | TJP1, ACTN2, Actn3, TUBB4A                |



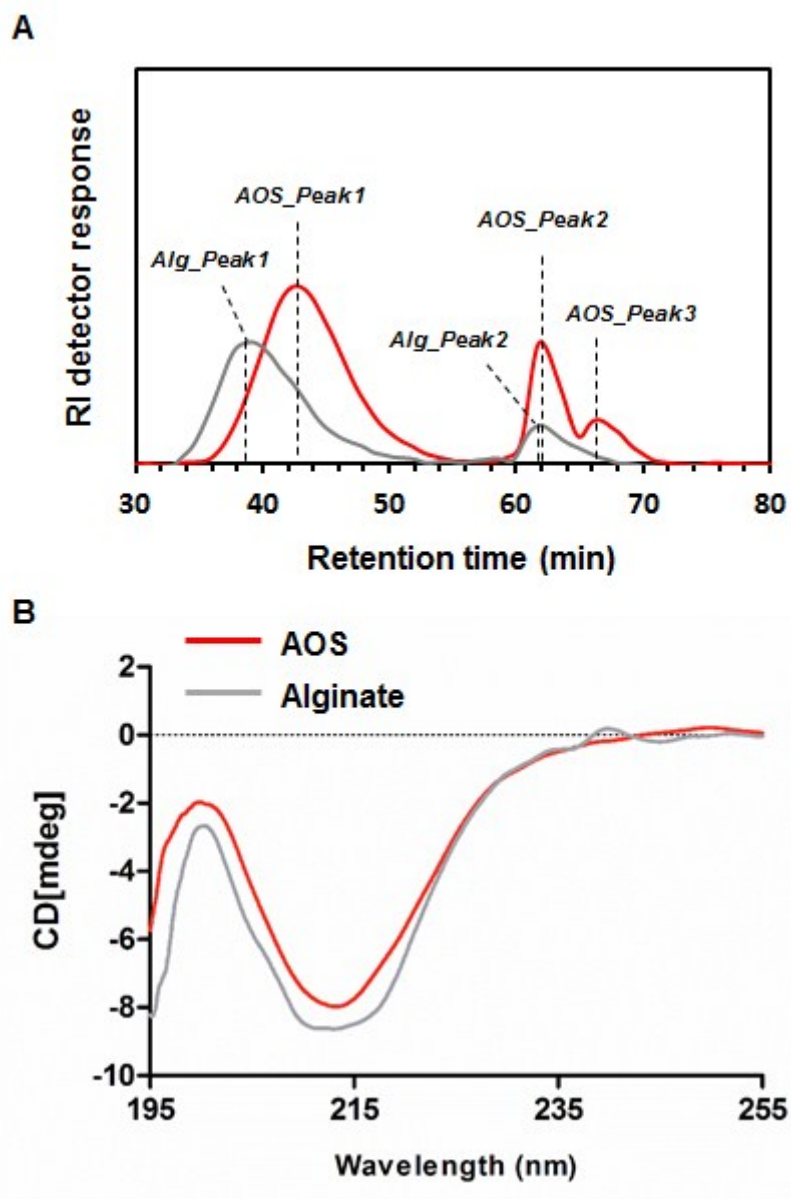

**Figure S1.** Characterization of depolymerized alginate oligosaccharide (AOS, red) in comparison with sodium alginate (Alg, grey) by gel filtration chromatograph GFC (A) and Circular dichroism (B).

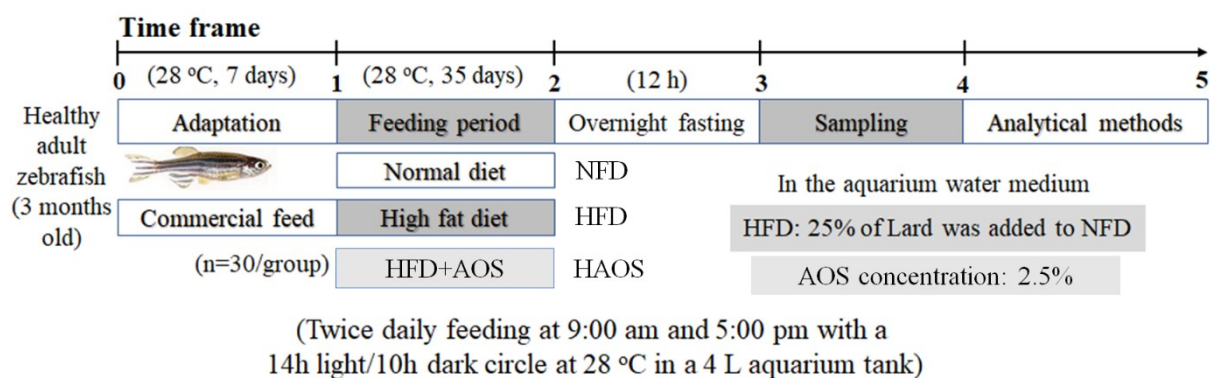

**Figure S2.** Outline of the HFD and AOS supplemented feeding protocol.

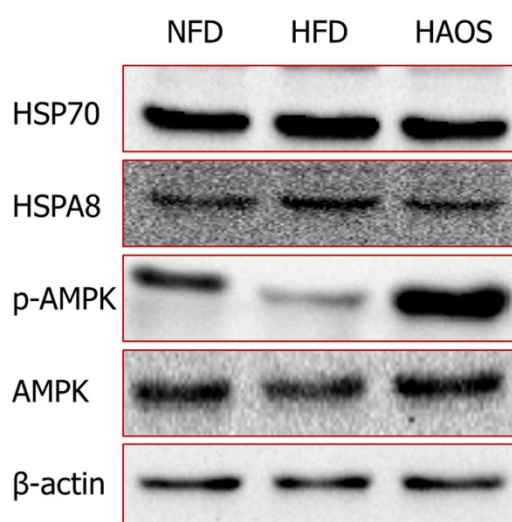

**Figure S3.** The western blotting analysis of protein in adult zebrafish of normal feeding diet (NFD), high-fat diet (HFD) and a high-fat diet supplemented AOS (HAOS) groups after feeding period (5 weeks). Proteins extracted from all treatment groups were quantified using a Pierce BSA Protein Assay Kit (23209; Thermo Scientific). Equal amounts of total proteins (20- $\mu$ g/well) were separated by 12% SDS-PAGE (Bio-Rad Laboratories) and transferred onto PVDF membranes (Immobilon Transfer Membrane, Millipore) at 4°C overnight. The membranes were blocked with 5% skim milk (BIOPURE, Seoul, Korea) in Tris-buffered saline with Tween-20 (TBS-T) for 1-h at room temperature (RT), washed thrice with TBS-T (5-min each), and incubated with primary antibodies against  $\beta$ -actin, heat shock protein (HSP)70, HSPA8, and p-AMPK and AMPK $\alpha$  (were freshly prepared in the blocking solution at concentration of 1:1,000, details are given in Table S6) at 4°C overnight. Then, the relevant conjugated secondary antibodies (1:10,000, Table S6) were used for incubation the membranes at RT, 1-h. Finally, the blots were detected using the Chemi-Doc systems.

**Table S6.** Details of antibodies used for western blotting

| ANTIBODIES          | SOURCE/SUPPLIER | IDENTIFIER                                                                                                                                |
|---------------------|-----------------|-------------------------------------------------------------------------------------------------------------------------------------------|
| $\beta$ -Actin      | Cell signaling  | $\beta$ -Actin Antibody #4967L;<br>1:1,000                                                                                                |
| HSPA8               | Cell signaling  | HSPA8 (D12F2) Rabbit mAb<br>#8444; 1:1,000                                                                                                |
| HSP70               | Cell signaling  | HSP70 (D69) Antibody<br>#4872S; 1:1,000                                                                                                   |
| AMPK $\alpha$       | Cell signaling  | AMPK-alpha Rabbit Antibody<br>#2532S; 1:1,000                                                                                             |
| p-AMPK $\alpha$     | Cell signaling  | Phospho-AMPK-alpha<br>(Thr172) Rabbit Antibody<br>#2531; 1:1,000                                                                          |
| Conjugated antibody | (Dako)          | Anti-rabbit secondary<br>antibodies (Ref. no. P0448;<br>Lot: 00094764; polyclonal<br>goat-anti rabbit<br>immunoglobulins/HRP;<br>1:10,000 |

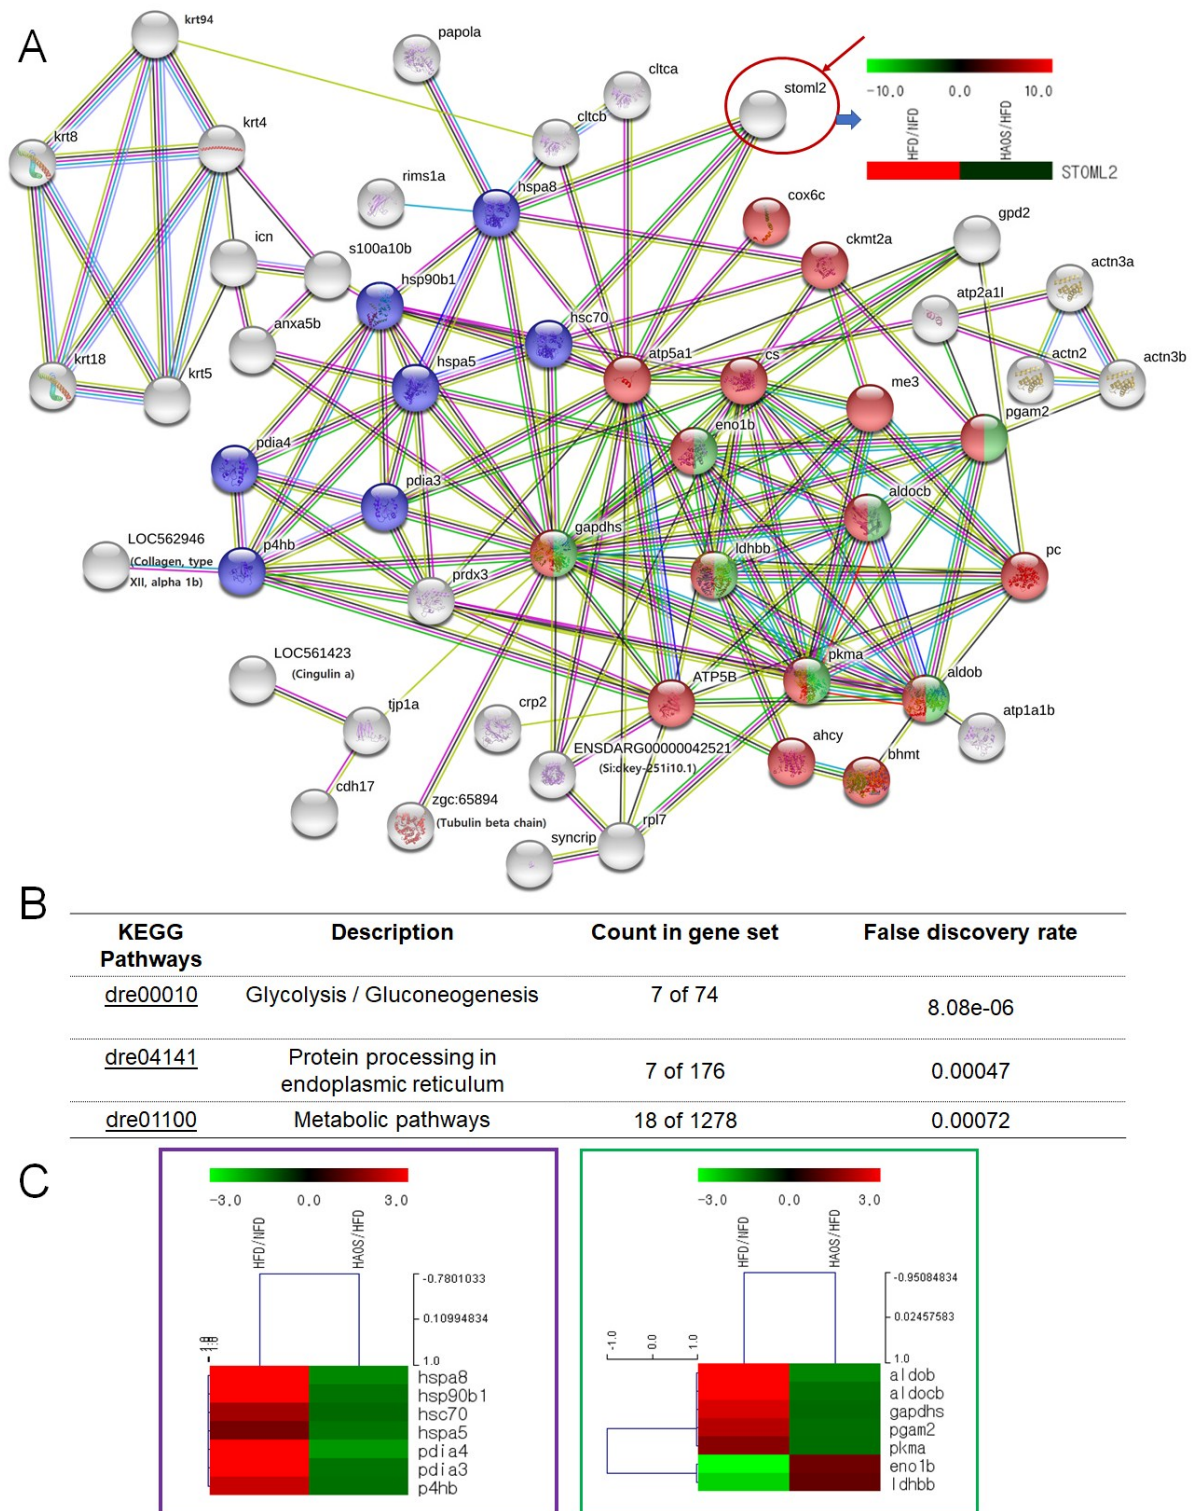

**Figure S4.** The network relationship analyzed by using a web-based search of the STRING database (<https://string-db.org/>, accessed on 15/02/2019). (A) Interaction network of 51 proteins that highly interacted together and differentially regulated between HFD and AOS treatment ( $p < 0.05$ ); STOML2 was predicted as a bridge factor between immune system (ER, nodes in blue) and metabolism (metabolic pathways, nodes in red) in zebrafish with HFD; (B) KEGG Pathways analysis and (C), A hierarchical heatmap of significant identified proteins of metabolism and immune systems. Ratios are shown as Log<sub>2</sub> fold change, with upregulated proteins having expressions  $> 0.0$ , red; downregulated proteins having expressions  $< 0.0$ , green; Anova  $p < 0.05$ .

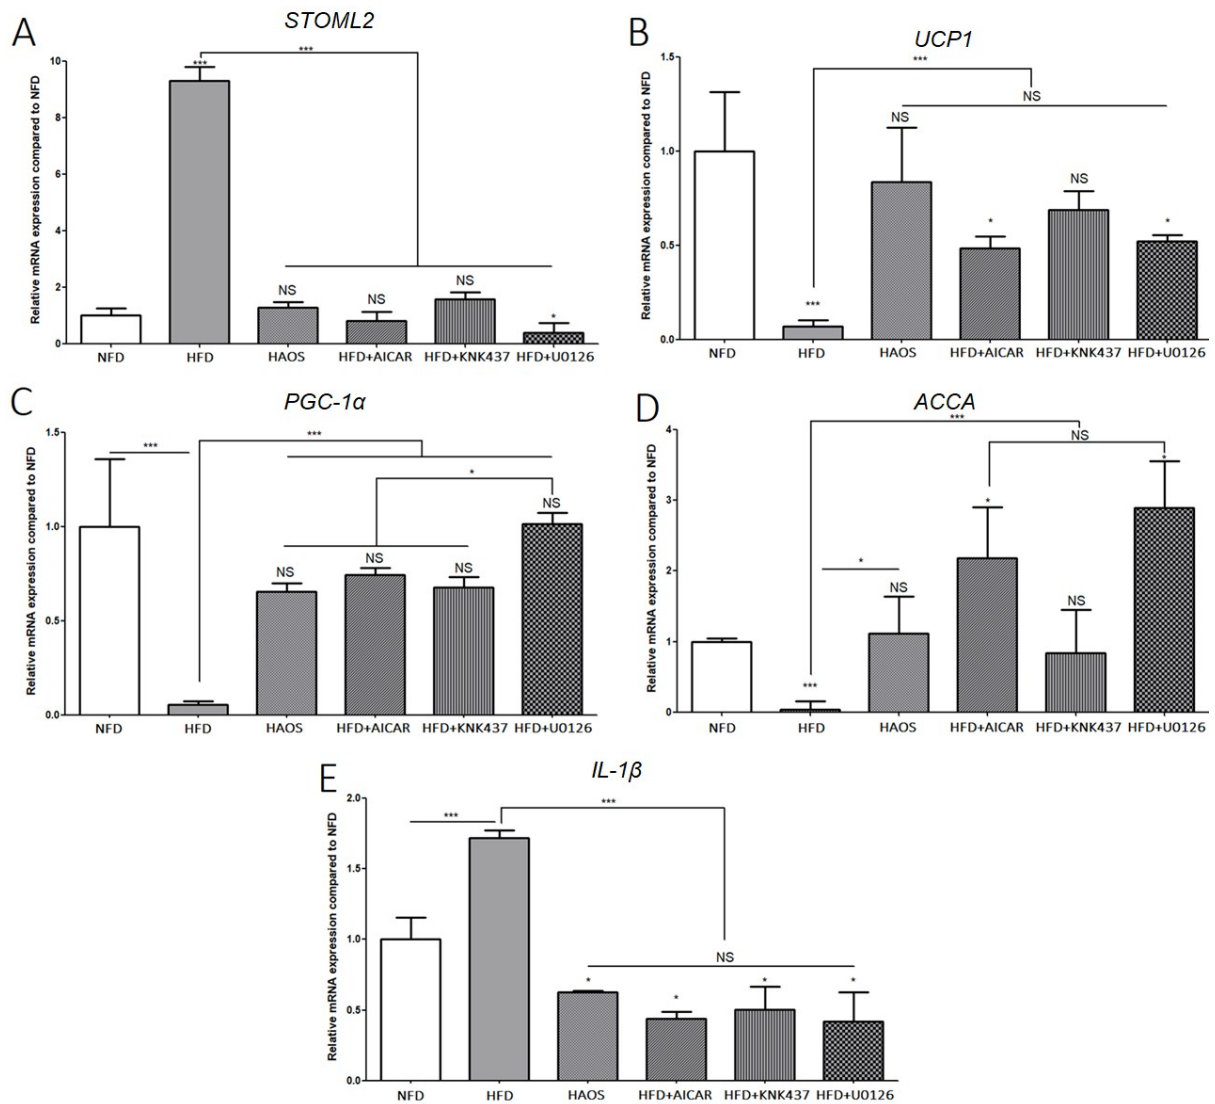

**Figure S5.** Relative mRNA expression levels of *STOML2* (A), *UCP1* (B), *PGC-1α* (C), *ACCA* (D) and *IL-1β* (E) in adult zebrafish of normal feeding diet (NFD) and high-fat diet (HFD) under different treatments. Results are means  $\pm$  SD of 3 - 4 replication. Asterisks and letters above bars indicate the level of significant difference from the groups determined using Student's t-test analysis (NS, not significance, \* $p < 0.05$ , \*\* $p < 0.01$ , and \*\*\* $p < 0.001$ ).
